# Supplementary material for: Wind Tunnel Load Measurements of a Leading-Edge Inflatable Kite Rigid Scale Model
Source: Copernicus journal article supplement (doi:10.5194/wes-2025-77), 2025-05-14
Supplement: Supplementary file [file wes-2025-77-AC2-supplement.pdf]

# Wind Tunnel Load Measurements of a Leading-Edge Inflatable Kite Rigid Scale Model

Jelle Agatho Wilhelm Poland<sup>1</sup>, Johannes Marinus van Spronsen<sup>1</sup>, Mac Gaunaa<sup>2</sup>, and Roland Schmehl<sup>1</sup>

<sup>1</sup>Faculty of Aerospace Engineering, Delft University of Technology, Kluyverweg 1, 2629 HS, Delft, the Netherlands

<sup>2</sup>Department of Wind and Energy Systems, Technical University of Denmark, Frederiksborgvej 399, 4000 Roskilde, Denmark

**Correspondence:** Jelle Agatho Wilhelm Poland (j.a.w.poland@tudelft.nl)

**Abstract.** Leading-edge inflatable (LEI) kites are morphing aerodynamic surfaces that are actuated by the bridle line system. Their design as tensile membrane structures has several implications for the aerodynamic performance. Because of the pronounced C-shape of the wings, a considerable part of the aerodynamic forces is redirected sideways and used for steering. The inflated tubular frame introduces flow recirculation zones on the pressure side of the wing. In this paper, we present wind tunnel measurements of a ~~1:6.5-1:6.5~~ rigid scale model of the 25~~m~~<sup>2</sup> m<sup>2</sup> TU Delft V3 LEI kite developed specifically for airborne wind energy (AWE) harvesting. ~~Because the real kite deforms during flight, the scale model was manufactured to match the well-defined design geometry.~~ Aerodynamic forces and moments were recorded in an ~~open-jet-open-jet~~ wind tunnel over ~~large ranges of wide ranges of flow conditions, including~~ angles of attack ~~and sideslip, for five different inflow speeds from -11.6° to 24.5°, sideslip angles from -20° to 20°, and freestream velocities from 5 to 25~~ ms<sup>-1</sup>. The wind tunnel measurements were performed with and without zigzag tape along the model's leading edge to investigate the possible boundary layer tripping effect of the stitching seam connecting the canopy to the inflated tube. ~~To quantify the quality of the acquired data, the autocorrelation-consistent confidence intervals, coefficient of variation, and measurement repeatability were reported, and the effects of sensor drift and flow-induced vibrations of the test setup at the highest Reynolds number were assessed.~~ At a Reynolds number of  $5 \times 10^5$ , the addition of zigzag tape was found to reduce lift and increase drag, indicating a negative impact on aerodynamic performance. The rigid scale model was manufactured to match the undeformed geometry employed in Reynolds-averaged Navier-Stokes (RANS) simulations from the literature, rather than the unknown in-flight deformed geometry. A representative subset of the measurements was ~~compared to Reynolds-averaged Navier-Stokes (RANS) flow simulations from literature, as well as new simulations conducted with an existing used to benchmark both these RANS and new~~ Vortex-Step Method (VSM). ~~In conclusion, the measured aerodynamic characteristics validate both RANS and VSM simulations under nominal kite operating conditions, with both models yielding similar trends and values within a 5 to 10% simulations. Both computational methods successfully reproduced the measured trends under nominal operating conditions. While discrepancies in drag persisted, excellent agreement for both lift and side force coefficients was observed, with deviations remaining within the 10% range.~~

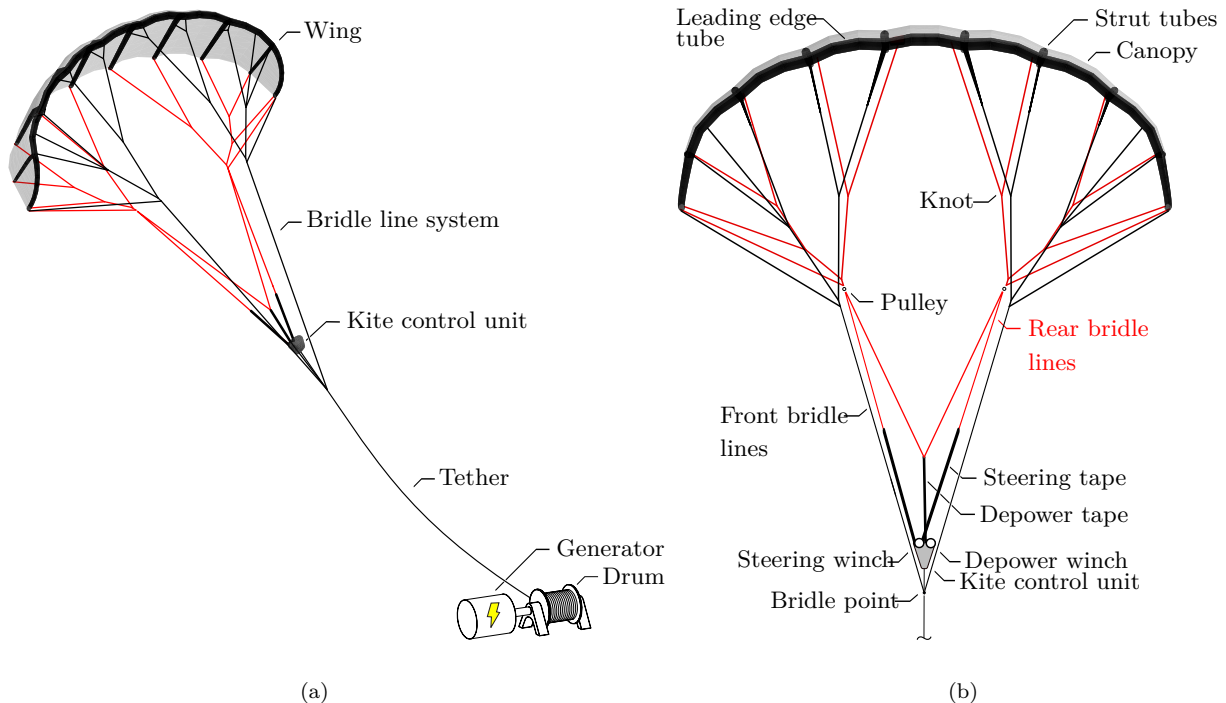

**Figure 1.** Ground-generating AWE system based on the TU Delft V3 kite, initially designed for a 20 kW technology demonstrator that was first used in 2012: (a) System overview, with tether and ground station depicted only schematically; (b) Components of the kite, consisting of wing, bridle line system and kite control. Adapted from Poland and Schmehl (2023).

## 1 Introduction

Airborne wind energy (AWE) systems use tethered flying devices to capture wind energy. The innovative technology promises to save up to 90% of the material mass of conventional wind turbines (Van Hagen et al., 2023; Coutinho, 2024), resulting in a lower environmental footprint and potentially lower costs while providing access to previously untapped wind resources at higher altitudes (Bechtle et al., 2019; Kleidon, 2021). A prominent concept, that is also highly mobile, uses the pulling force of a soft kite maneuvered in cross-wind patterns to drive a ground-based drum-generator module (Vermillion et al., 2021; Fagiano et al., 2022). Figure 1(a) illustrates the components of such an AWE system equipped with a leading-edge inflatable (LEI) kite with suspended kite control unit (KCU). ~~To provide a continuous power output, the kite is operated~~ The kite operates in pumping cycles, alternating between traction and retraction phases, to generate a net positive power output. During the reel-out phase, the kite is guided in cross-wind flight patterns with its wing pitched to a high angle of attack. Once the tether reaches its maximum length, the cross-wind patterns are terminated, the wing is pitched to a low angle of attack and the tether is retracted, using some of the previously generated and buffered energy. The cyclic operation results in a net energy gain because the

aerodynamic force during the reel-out phase is substantially larger than the force in the reel-in phase, which is also shorter than the reel-out phase.

Figure 1(a) further details the components and actuation layout of the kite. The KCU pitches and morphs the wing by adjusting the lengths of the rear bridle lines via the steering and depower tapes. Besides this actuation-induced deformation, the tensile membrane structure is also subject to strong aero-structural coupling (Oehler and Schmehl, 2019). The tubular frame of the wing consists of an inflatable leading edge tube and several connected inflatable strut tubes. This frame provides structural stability for handling on the ground and for launching and landing, and, once the kite is in flight, it transmits the aerodynamic forces from the canopy to the bridle line system (Poland and Schmehl, 2023).

An optimal kite design can be regarded as an effective compromise between pulling force and controllability, acknowledging that both competing properties are tightly coupled. For instance, increasing the aspect ratio will generally increase the pulling force but decrease the agility of the kite. Similarly, making the wing flatter will increase its pulling force but decrease its steerability.

The aerodynamic properties of a kite have a major influence on the amount of wind energy that can be harvested. Accordingly, these properties play an important role in kite design, performance estimations, failure load prediction, and stability analysis for ensuring reliable and robust operation. A common approach for aerodynamic system identification is based on flight experiments. One option that provides reasonable control over the inflow conditions is towing a small kite along a straight track to measure lift, drag, and dynamic response (Dadd et al., 2010; Python, 2017; Hummel et al., 2019; Rushdi et al., 2020; Elfert et al., 2024). A second option, applicable to larger industrial-scale kites, involves directly using sensor data from an operating AWE system to determine forces, position, and inflow conditions (Schmidt et al., 2017; Van der Vlugt et al., 2019; Oehler and Schmehl, 2019; Roullier, 2020; Schelbergen and Schmehl, 2024; Cayon et al., 2025). However, in-flight experiments are expensive, risky, and offer limited control over inflow conditions.

A less expensive, safer, and more scalable alternative is numerical simulation, which, due to actuation-induced morphing and strong aero-structural coupling, generally requires iterative resolution of both aerodynamic and structural mechanics (Breukels, 2011; Leloup et al., 2013; Bosch et al., 2014; Duport, 2018; Van Til et al., 2018). However, simulations necessitate validation, which is best achieved through wind tunnel testing that allows precise control of inflow conditions. Moreover, simulations are constrained by computational limitations—such as the need to ensure numerical stability and finite computational resources—which often necessitate simplifications such as RANS modelling. Wind tunnel tests, therefore, serve not only for validation, but also enable controlled, repeatable parametric studies that are difficult or impractical to perform numerically. Although wind tunnel experiments for LEI kites have not been reported in the public literature, related soft-wing structures have been described, including sail airfoil sections (Den Boer, 1980), paragliders (Nicolaidis, 1971; Matos et al., 1998; Babinsky, 1999), ram-air wings (Wachter, 2008; Rementeria Zalduegui and Garry, 2019), and inflatable wings (Cocke, 1958; Smith et al., 2007; Okda et al., 2020; Desai et al., 2024).

One significant challenge for wind tunnel studies of industrial kites is that these membrane structures ~~ranging from 50 to 500 do not fit inside standard tunnels and thus require scaling,~~ which typically range from 50 to 500 m<sup>2</sup>, cannot be accommodated within standard wind tunnels and therefore necessitate down-scaling. Aeroelastic effects complicate scaling because maintaining the correct proportion of structural to aerodynamic loads is non-trivial, as highlighted by Oehler et al. (2018). Additionally, developing such models encounters manufacturing and structural material limitations; for instance, adjusting beam bending stiffness would necessitate impractically high inflation pressures. Lastly, comparing experimental data to aero-structural coupled simulations lacks specificity, making it unclear whether discrepancies arise from errors in modeling aerodynamics, structural dynamics, coupling mechanisms, or other factors.

Wind tunnel experiments using rigid kite models eliminate the aeroelastic scaling issues and provide aerodynamic data with a high degree of certainty on the inflow. Belloc (2015) presented wind tunnel measurements of a ~~1:8-1:8~~ scale paraglider model, in which the anhedral angle ~~follows an elliptical shape~~ defined as the downward inclination of the wing relative to the horizontal plane when viewed from the front, ~~and it follows an elliptical shape, and the model~~ incorporates a spar made of a wood-carbon composite sandwich. During the tests, inflow velocities reached ~~40~~ 40 ms<sup>-1</sup>, corresponding to Reynolds numbers of ~~9.2 × 10<sup>5</sup>~~ 9.2 × 10<sup>5</sup>. The experiments covered angles of attack ranging from -5 to ~~2222~~° and sideslip angles from -15 to ~~15~~15°. The results showed that the arched paraglider wing exhibits distinct aerodynamic behaviour compared to a flat wing, especially in lateral dynamics. Wing curvature couples sideslip and local angle of attack, modulating spanwise lift distribution and generating lateral force, pitch-down moment, stabilising yaw moment, and a roll moment that lifts the wingtip opposite to the sideslip direction, referred to as ‘pendulum stability’.

Omitting deformation isolates the aerodynamic problem and provides the necessary specificity to validate simulations. The literature reports LEI kite aerodynamic simulations ranging from low-fidelity potential flow methods to high-fidelity computational fluid dynamic (CFD) methods. The potential flow methods are often a form of Prandtl (1918) lifting-line theory, and to increase accuracy, most models include the addition of nonlinear section lift-curve slopes, i.e., airfoil polars (Leloup et al., 2013; De Solminihac et al., 2018; Cayon et al., 2023). The airfoil polar aerodynamic simulations should incorporate viscosity and vorticity to accurately represent the generally present separation zone aft of the inflatable tube, e.g., using Reynolds-Average Navier Stokes (RANS) CFD (Breukels, 2011; Folkersma et al., 2019; Watchorn, 2023). RANS CFD simulations have also been conducted in three dimensions for the TU Delft V2 kite (Deaves, 2015) and for the V3 kite with and without struts (Viré et al., 2020, 2022).

The present paper is based on the graduation project of Van Spronsen (2024), presenting a novel wind tunnel experiment of an LEI kite to acquire validation data for numerical tools. The aerodynamic characteristics of a rigid scale model of the V3 kite ~~are~~ were obtained over an extensive range of inflow conditions, with a high degree of certainty ~~on~~ regarding the match between simulated and measured geometry and inflow conditions. Thorough analysis of potential sources of uncertainty ~~reinforces~~ reinforced the reliability of the measured aerodynamic loads. In addition, the effects of forced ~~boundary-layer~~ boundary-layer transition, Reynolds number variation, and sideslip ~~are~~



were examined in detail. Measured aerodynamic forces and moments ~~are~~ were compared with numerical simulations  
110 to assess the consistency between experimental and computational results.

The remainder of this paper is organized as follows. Section 2 describes the experimental methodology. Section 3 presents the results of our wind tunnel tests, focusing on analyzing the uncertainties and the effect of Reynolds number. A discussion on the agreement with numerical predictions follows in Sect. 4, and the conclusions are presented in Sect. 5 along with recommendations for future work.

## 115 2 Experimental methodology

This section first discusses the specifics of the wind tunnel and the scale model. This is followed by a description of the experimental setup, the measurement matrix, zig-zag tape measurements, and the data processing method, including the required wind tunnel corrections.

### 2.1 Open Jet Facility

120 The wind tunnel experiments were conducted in the Open Jet Facility (OJF) at the Faculty of Aerospace Engineering of Delft University of Technology from 1 to 10 April 2024. The facility is a closed-loop wind tunnel, featuring an octagonal jet exhaust nozzle with maximum dimensions of  $2.85 \times 2.85$  m, and a contraction ratio of 3:1, as illustrated in Fig 2. The jet discharges into a test section room with dimensions 13 m in width and 8 m in height. The wind tunnel is equipped with a 500 kW electric motor driving a large fan, which generates a controlled streamwise velocity  
125 of up to  $35 \text{ ms}^{-1}$  in the test section. Corner vanes and wire meshes guide the flow to ensure uniform flow conditions, resulting in a turbulence intensity of 0.5% in the test section (Lignarolo et al., 2014).

### 2.2 Rigid scale model

As the original TU Delft LEI V3 kite is 8.3 m wide and the width of the OJF exhaust nozzle is only 2.85 m, a scale model had to be used. With the main purpose of the measurement campaign being the acquisition of validation data  
130 for numerical tools, the scale model was manufactured to match the wing geometry used in earlier CFD simulations (Viré et al., 2022). This geometry ~~differs~~ was adapted from the original ~~CAD geometry in several aspects: it does not include the design~~ CAD model to facilitate mesh smoothness in the simulations. Notably, the bridle line system was omitted, the trailing edge connecting the upper and lower canopy surfaces ~~is~~ was rounded, and an edge fillet ~~is~~ was applied at all ~~canopy-tube connections. The canopy-tube junctions. The only difference between the CFD and~~ manufactured geometries is the use of a canopy with increased thickness for structural integrity—3 to 4 mm instead of 1 mm. The model geometry was verified using a laser tracker with a spatial resolution of ~~0.5~~ 0.5  $\mu\text{m}$  (FARO, 2024).  
Figure 3 compares the manufactured physical model with the ~~rendering of the~~ rendered geometry and the overlaid laser-tracked outline of the physical model. The agreement between the manufactured and rendered geometry was

Manually adjustable horizontal bar

Support structure

Load balance

6

Rotary table

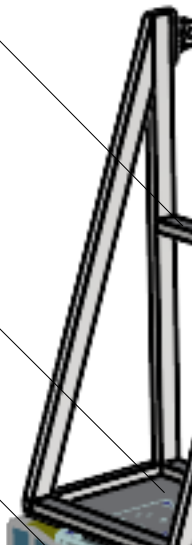

within 1 mm in chord, height, and width, corresponding to errors of less than 0.25% in all cases, as detailed in Table 1.

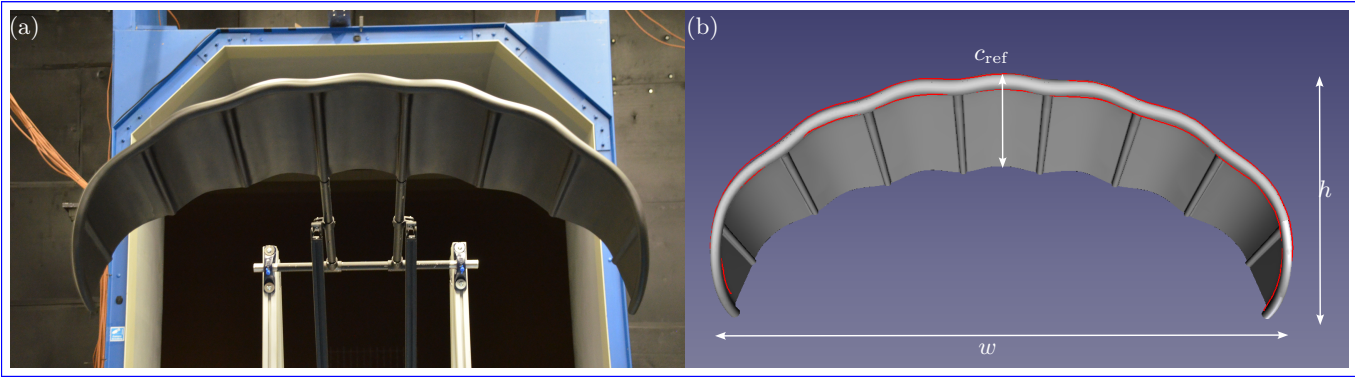

**Figure 3.** Rigid scale model of the TU Delft LEI V3 kite: (a) ~~Photo-photograph~~ of the model, rotated by ~~180~~180°, with its back facing the blue octagonal OJF exhaust nozzle; (b) ~~Rendering-rendering~~ of the model, from a similar perspective, with ~~overlaid~~ the laser-tracked outline overlaid in red, and the reference chord  $c_{ref}$ , height  $h$ , and width  $w$  indicated in white.

**Table 1.** Properties of the rigid scale model, including values for the physical scale model and the scaled design geometry. The physical model properties were measured using a laser tracker, while the scaled design geometry values correspond to the scaled design geometry of the kite. The relative error between the physical model and the scaled design geometry is also provided.

| Property          | Symbol    | Unit           | Physical Scale Model | Scaled <del>Design</del> <u>CFD</u> Geometry | Relative Error (%) |
|-------------------|-----------|----------------|----------------------|----------------------------------------------|--------------------|
| Midspan chord     | $c_{ref}$ | m              | 0.395                | 0.396                                        | 0.25               |
| Height            | $h$       | m              | 0.462                | 0.462                                        | 0.00               |
| Width             | $w$       | m              | 1.278                | 1.277                                        | 0.08               |
| Mass              | $m$       | kg             | 7.965                | -                                            | -                  |
| Flat surface area | $S$       | m <sup>2</sup> | -                    | 0.59                                         | -                  |
| Planform area     | $A$       | m <sup>2</sup> | -                    | 0.46                                         | -                  |

~~Projected frontal area at~~  
 ~~$\alpha = 24.4^\circ - 0.2^\circ$~~

Considering manufacturing costs, handling limitations, Reynolds number scaling, and wind tunnel blockages, we decided on a 1:6.5 scaling of the wind tunnel model, leading to the dimensions listed in Table 1. The anhedral swept

wing with a bow-shaped leading edge and double-curved canopy was manufactured by Curveworks B.V. using carbon fiber reinforced plastic layed-up in a 3D-milled mold from structural foam. The canopy is 3 mm thick, except for the two central panels, which are 4 mm as they need to sustain a higher load. The outer layers provided the most structural support and were made of carbon fiber. The 1 or 2 mm inner layers were made of a glass fiber-reinforced polymer. Structural foam was used inside the chordwise struts, except for the two inner struts, which incorporate two parallel steel rods. These rods slide into the two aluminum sleeve tubes of the support frame, as illustrated in Fig. 3(a).

### 2.3 Measurement equipment

The support frame is a truss structure assembled from custom-cut aluminum profiles. The angle of attack  $\alpha$  quantifies the inclination of the mid-span chord line with respect to the inflow, and can be adjusted as illustrated in Fig. 4. The angle was measured with an accuracy of  $0.1^\circ$  by placing two digital inclinometers on the aluminum sleeve tubes. The measured value is converted to the angle of attack  $\alpha$  by subtracting the offset angle  $6.3^\circ$  between the chord line and the parallel steel rods of the model. The support structure was placed aft of the kite to minimize flow

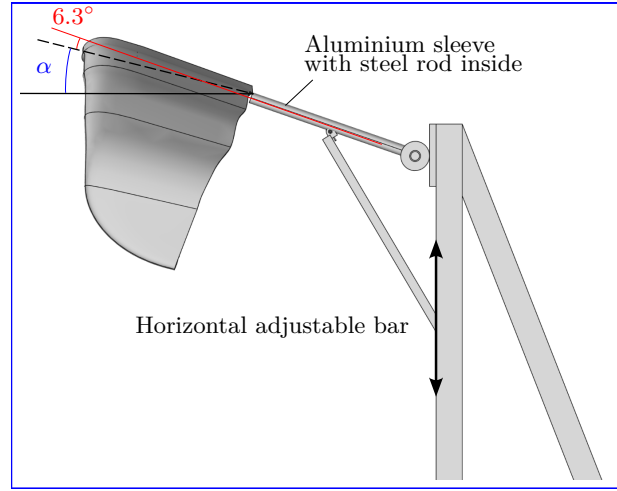

**Figure 4.** Manual setting of the scale model's angle of attack with respect to the inflow by adjusting the vertical position of the strut attachment to the support structure. The center of gravity of the scale model is indicated by point CG.

interference and mounted onto a 6-component load balance, as illustrated in Fig. 2. The balance operates at 2000 Hz and is equipped with six load cells able to measure the longitudinal, inflow-aligned ( $F_x$ ), transverse ( $F_y$ ), and vertical ( $F_z$ ) forces, and the roll ( $M_x$ ), pitch ( $M_y$ ) and yaw ( $M_z$ ) moments. The entire assembly was mounted on a rotary table, allowing a remote adjustment of the side slip angle  $\beta$  with an angular resolution of  $0.01^\circ$ . The side slip angle is defined with respect to the origin  $O$  and positive in the positive yaw direction.

## 2.4 Measurement matrix

The experiments were conducted for most combinations of  $\alpha$ ,  $\beta$ , and  $U_\infty$  values displayed in Table 2. Due to time constraints, not all  $\beta$  values were tested for each  $\alpha$  value. The Reynolds number,

**Table 2.** Parametric combinations investigated with wind tunnel measurements.

| Parameter                                                                              | Range                                                                                                         |
|----------------------------------------------------------------------------------------|---------------------------------------------------------------------------------------------------------------|
| Angle of attack $\alpha$ ( $^\circ$ )                                                  | $-11.6, -6.1, -2.0, -1.3, 3.1, 5.4,$<br>$7.4, 9.4, 11.5, 12.5, 13.4, 14.5, 16.2,$<br>$18.3, 20.2, 23.0, 24.5$ |
| Inflow speed $U_\infty$ ( $\text{ms}^{-1}$ )                                           | 5, 10, 15, 20, 25                                                                                             |
| Reynolds number <del><math>\text{Re}/10^5</math></del> $\text{Re} \times 10^5$ ( $-$ ) | 1.3, 2.5, 3.8, 5.0, 6.1                                                                                       |
| Side slip $\beta$ ( $^\circ$ )                                                         | $-20, -14, -12, -10, -8, -6, -4, -2,$<br>$0, 2, 4, 6, 8, 10, 14, 20$                                          |

$$\text{Re} = \frac{U_\infty c_{\text{ref}}}{\nu}, \quad (1)$$

is used to characterize the flow regime, recalculating the kinematic viscosity  $\nu$  for each value of  $U_\infty$  using Sutherland's law (Poling et al., 2001). The characteristic aerodynamic time (Flay and Jackson, 1992), defined as the ratio between  $c_{\text{ref}}$  and  $U_\infty$ , represents the time for a fluid element to travel along the reference chord length of the kite. A measuring period of 10 s, resulting in 125 to 625 fluid parcel passings depending on the used  $U_\infty$ , was thus deemed a statistically sufficient sampling period; further details are presented in App. A. Measurements without the kite were made over the full range of parameters to quantify the aerodynamic loads on the support structure only. The interference effects between the support structure and the kite are assumed to be negligible. To ensure consistency, measurements taken with  $\alpha = 5.7^\circ$ , at  $U_\infty = 20 \text{ ms}^{-1}$  and  $\beta = -20, 0$ , and  $20^\circ$  were repeated three times. Furthermore, the sensor drift of the ~~free-load~~ balance during the campaign was analyzed through six measurements done over a 30 s time interval each morning and evening with  $U_\infty = 0 \text{ ms}^{-1}$  for three consecutive days.

## 2.5 Laminar-turbulent flow transition

Using two-dimensional (2D) CFD simulations, Folkersma et al. (2019) showed that incorporating a boundary layer transition model significantly affects the aerodynamic predictions for  ~~$\text{Re} < 200 \times 10^5$~~   $\text{Re} < 2 \times 10^7$ . This motivated the use of natural transition modeling in subsequent three-dimensional (3D) CFD simulations of the V3 kite (Viré et al., 2020, 2022). In practice, transition may be influenced by the zigzag-patterned stitching seam connecting the canopy to the tube along the span, as shown in Fig. 5(a). Whether this seam height would be sufficient to induce

transition remained uncertain, however. To address this, additional measurements with zigzag tape ~~, as shown in~~  
were conducted, the setup is shown on Fig. 5(b), ~~were conducted to assess the effect of forced transition.~~

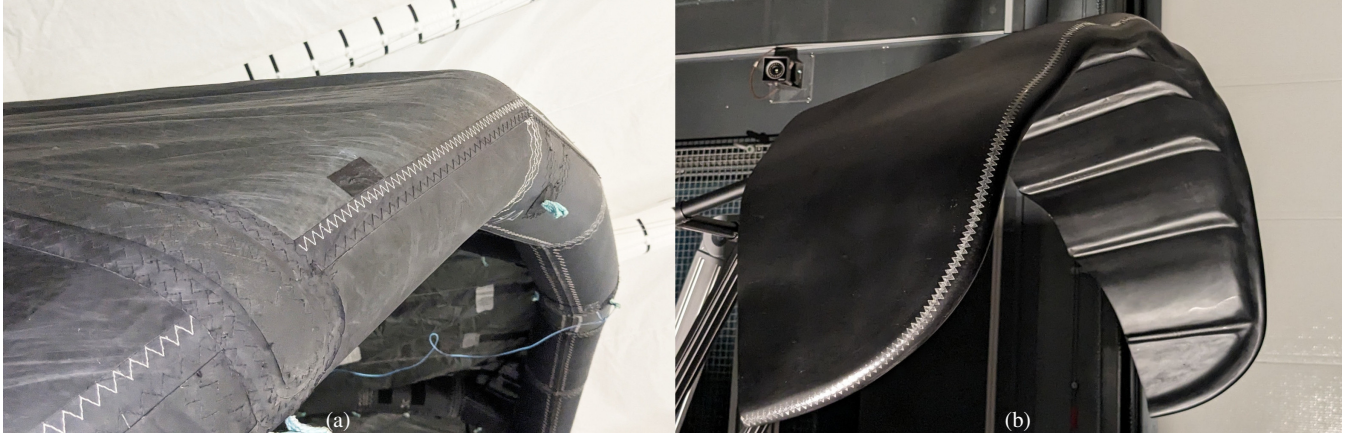

**Figure 5.** (a) Kitepower V3.25B kite with seams along the leading edge; (b) Scale model with zigzag tape applied to the leading edge. Although slightly different designs, the V3.25B and TU Delft V3 kites are practically identical with respect to the flow over the wing's suction side.

The critical roughness Reynolds number  $Re_{k,crit}$  is commonly used to quantify the height threshold at which a surface roughness element induces boundary layer transition. The numerical estimation of this number is nontrivial,  
 185 as it depends on local pressure gradients, freestream disturbances, geometry, and roughness characteristics (Ye, 2017). In practice, trip heights are often estimated through empirical correlations (Langel et al., 2014; Gahraz et al., 2018). Braslow and Knox (1958) reported typical values of  $Re_{k,crit}$  ranging between 300 and 600. For zigzag or wavy-patterned 2D roughness, Balakumar (2021) adopted a value of 300, while others found 200 to be sufficient (van Rooij and Timmer, 2003; Elsinga and Westerweel, 2012). Given a value of  $Re_{k,crit}$ , the corresponding roughness  
 190 height  $k$  can be computed using the relation (Braslow and Knox, 1958)

$$k = \frac{Re_{k,crit} \nu}{U_k}, \quad (2)$$

where,  $U_k$  is denotes the local velocity at the roughness height, which ~~may be lies within the boundary layer and is~~  
therefore different, i.e. generally somewhat smaller, than the external velocity  $U_\infty$ ; nonetheless, it is often approxi-  
 mated by  $U_\infty$  ~~(Driest and McCauley, 1960; Tani, 1969)~~ for practical purposes (Driest and McCauley, 1960; Tani, 1969)  
 195 . For a more precise assessment, the local velocity profile within the boundary layer could be employed to determine  
 $U_k$  directly; however, this typically necessitates either supplementary measurements or detailed boundary-layer  
computations, which were not available in the present study. The resulting functional dependency of  $k$  on the  
 Reynolds number defined by Eq. (1) is shown in Fig. 6 for two different values of  $Re_{k,crit}$ . The diagram also includes  
 the selected tape height of 0.2 mm to trigger transition from approximately  $Re \geq 3.9 \times 10^5$  according to the estimate  
 200  $Re_{k,crit} = 200$ . The tape, produced by Glasfaser Flugzeug-Service GmbH with a  $60^\circ$  tooth angle, was applied at 5%

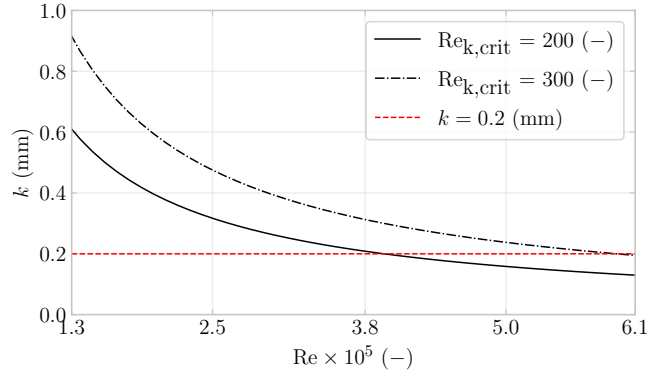

**Figure 6.** Required minimal trip height versus  $Re$  for different values of  $Re_{k,crit}$ .

chord, following the approach in Soltani et al. (2011); Gahraz et al. (2018); Dollinger et al. (2019); De Tavernier (2021).

## 2.6 Data post-processing

The measured load data were converted to the non-dimensional aerodynamic coefficients as follows:

1. subtract zero-wind measurements,
2. non-dimensionalize the load data,
3. translate the coordinate system, from the load balance origin  $O$  to the center of gravity of the scale model
4. correct for sideslip,
5. subtract non-dimensionalized support structure loads,
6. apply wind tunnel corrections.

(1) First, the zero-wind measurements taken before every  $\alpha$  change were subtracted to eliminate background noise from the signals, including the structure's weight and sensor drift.

- (2) In the next step, the measurements were ~~non-dimensionalized~~ non-dimensionalised using the air density  $\rho$ , ~~which varied from 1.14 to 1.19~~, determined at each measurement point, varying from 1.14 to 1.19 kg m<sup>-3</sup>; the inflow speed  $U_\infty$ , ~~the~~ the projected area  $A$ , ~~and the reference chord  $c_{ref}$  of the scale model, as listed in Table 1.~~ and the reference chord  $c_{ref}$  of the scale model, as listed in Table 1. The forces  $F_i$  and moments  $M_{i,b}$  ~~are~~ were non-dimensionalized using

$$C_i = \frac{2F_i}{\rho U_\infty^2 A}, \quad i=1,2,3,$$

$$C_{M,i,b} = \frac{2M_{i,b}}{\rho U_\infty^2 A c_{ref}}, \quad i=1,2,3.$$



(3) To represent the moment coefficients in the wing reference frame, they had to be translated from the load-  
 220 balance measurement center to the center of gravity CG of the scale model. ~~With  $\alpha = 0$~~  When the mid-span chord-line is aligned with the  $x$ -axis, the CG is located at  $-0.172$  m in  $x$ - and  $-0.229$  m in  $z$ -direction with respect to the mid-span trailing-edge point, see Fig. 4. The distance from the origin  $O$  to the CG varied with angle of attack but remained constant with sideslip, as the load balance was mounted atop the rotary table and therefore rotated with it. The rolling moment coefficient  $C_{M,x,b}$  is translated using,

$$225 \quad C_{M,x} = C_{M,x,b} - C_{F,y}z_{cg}. \quad (3)$$

The pitching- and yawing-moment coefficients,  $C_{M,y}$  and  $C_{M,z}$ , respectively, ~~are~~ were determined as

$$C_{M,y} = -C_{M,y,b} + C_{F,z}x_{cg} - C_{F,x}z_{cg}, \quad (4)$$

$$C_{M,z} = -C_{F,z,b} - C_{F,y}x_{cg}. \quad (5)$$

In these expressions,  $x_{cg}$ ,  $y_{cg}$  and  ~~$x_{cg}$~~   $z_{cg}$  are the coordinates of the scale model's center of gravity, with respect to  
 230  $O$ .

(4) Because the ~~force-load~~ balance was mounted on top of the rotary table, and  $y$  is defined perpendicular to the incoming flow, the force and measured moment coefficients had to be corrected for the sideslip. The force and moment coefficient vectors ~~are~~ were transformed, at each sideslip angle  $\beta_i$ , through matrix multiplication with the rotation matrix  $\mathbf{R}$ :

$$235 \quad \mathbf{R} = \begin{bmatrix} \cos \beta & \sin \beta & 0 \\ -\sin \beta & \cos \beta & 0 \\ 0 & 0 & 1 \end{bmatrix}. \quad (6)$$

(5) To isolate the aerodynamic forces of the kite, measurements were made with only the support structure. These measurements were performed at the minimum, mean, and maximum  $\alpha$  values. Missing data points were determined by interpolation, which was carried out by fitting two linear segments from the minimum to the mean and from the mean to the maximum, respectively.

240 The aerodynamic loads on the support structure only were measured and processed through steps (1) to (4) such that the resulting aerodynamic coefficients could then be subtracted from the coefficients of the kite including the support structure. It was critical to non-dimensionalize before subtracting these measurements, as atmospheric conditions could not be assumed constant throughout the experiment. Specifically, during the experiment, the temperature varied between 20 and 32°C.

245 (6) The last step entailed applying the wind tunnel corrections that arise from blockage, streamline curvature, and downwash or upwash in both  $y$ - and  $z$ -directions. For a detailed analysis of these effects, the reader is referred to App. B. The conclusions ~~are~~ were that with a blockage factor of 3%, the corrections due to blockage are negligible, which aligns with the recommendations of Wickern (2014) to keep the blockage factor below 5% and of Barlow et al.

(1999) to stay below 7.5%. Following Barlow et al., the corrections due to streamline curvature and downwash were  
 250 calculated and found to be non-negligible, shown in Table B1, and hence applied.

### 3 Results

This section first addresses measurement uncertainties, followed by the effect of forced boundary layer transition. Subsequently, the aerodynamic force and moment coefficients are presented as functions of the angle of attack and sideslip angle, with the Reynolds number as parameter.

#### 255 3.1 Uncertainty analysis

This section quantifies the main sources of measurement uncertainty to ensure data reliability and repeatability, including sensor drift, support-to-kite load proportion, vibration analysis, coefficient of variation, and measurement repeatability. Although a load balance sensor drift was detected, it was concluded not to affect the results, as detailed in App. C. Analyzing the proportions of support-structure loads to kite loads as signal-to-noise ratio, one finds high  
 260 certainty for lift and lower for  $C_{M,y}$ ,  $C_{M,z}$ , as detailed in App. D.

For some measurements at  $U_\infty = 25 \text{ ms}^{-1}$  and high values of  $\alpha$  and  $\beta$ , the wind tunnel model started to vibrate considerably. To avoid physical damage, these specific measurements were not completed, which is why some data points are missing at  $\text{Re} = 6.1 \times 10^5$ . A vibration analysis revealed structural resonance at 4–5 Hz, close to the resonance frequency of the supporting blue table (see Fig. 2) as reported in LeBlanc and Ferreira (2018). This  
 265 frequency band was not filtered to avoid introducing processing artifacts. See App. E for ~~details~~further details, i.e., e.g., time series and power spectral density analyses.

The coefficient of variation, denoted as CV, offers a dimensionless metric for comparing variability across different datasets by ~~normalizing~~normalising the standard deviation relative to the mean (Pearson, 1896), ~~For each aerodynamic force or moment coefficient,~~

$$270 \quad \text{CV}_{\underline{i}} = \frac{\overline{\sigma_i}}{\underline{\mu_i}} \frac{\overline{\sigma_i}}{\underline{\mu_i}}, \quad \underline{i} \in \{\underline{L}, \underline{2D}, \underline{3S}, \underline{4M_x}, \underline{5M_y}, \underline{6M_z}\}$$

where  $\overline{\sigma_i}$  is the average standard deviation of coefficient  $i$ , and  $\underline{\mu_i}$  is its mean value, both computed over the ensemble of measurements. Table 3 lists  $\text{CV}_i$  for each Re, except for  $\text{Re} = 6.1 \times 10^5$ , which is excluded due to incomplete data. The means  $\mu_i$  were computed over the full range of  $\alpha$  and  $\beta$  for  ~~$\text{CV}_{V,L}$ ,  $\text{CV}_{V,D}$ , and  $\text{CV}_{V,M,y}$ .~~ For  $\text{CV}_{V,S}$ ,  $\text{CV}_{M,x}$ , and  $\text{CV}_{V,M,z}$   $\text{CV}_L$ ,  $\text{CV}_D$ , and  $\text{CV}_{M,x}$ . For  $\text{CV}_S$ ,  $\text{CV}_{M,x}$ , and  $\text{CV}_{M,z}$ , only positive values of  $\beta$  were considered to avoid  
 275 including near-zero loads at  $\beta = 0^\circ$ , which could lead to inflated values of  $\text{CV}_i$  and skew the statistical averages.

~~The decline in  $\text{CV}_i$  values from  $\text{Re} = 1.3$  to  $2.5 \times 10^5$  reflects a reduction in measurement uncertainty, likely due to an improved signal-to-noise ratio at higher wind speeds. Force measurements generally exhibit lower relative uncertainty compared to moment measurements, which is attributed to their inherently lower signal-to-noise ratios. The cases at  $\text{Re} = 3.8$  and  $5 \times 10^5$  show the smallest values of  $\text{CV}_i$ , indicating the highest measurement precision.~~

**Table 3.** Coefficient of variation  $CV_i$  of the data for varying  $Re$ .

| $Re \times 10^5$ (—) | 1.3   | 2.5  | 3.8  | 5    |
|----------------------|-------|------|------|------|
| $CV_L$               | 1.11  | 0.35 | 0.17 | 0.15 |
| $CV_D$               | 0.84  | 0.54 | 0.53 | 0.58 |
| $CV_S$               | 1.27  | 0.94 | 0.89 | 0.90 |
| $CV_{M,x}$           | 5.67  | 2.28 | 2.18 | 2.31 |
| $CV_{M,y}$           | 33.40 | 8.43 | 4.54 | 5.33 |
| $CV_{M,z}$           | 2.90  | 2.54 | 2.90 | 2.24 |

The decline in  $CV_i$  values from  $Re = 1.3$  to  $2.5 \times 10^5$  reflects a reduction in relative measurement uncertainty, as the standard deviation becomes smaller relative to the mean. In this work, force measurements exhibited lower relative uncertainty compared to moment measurements, which can be attributed to their inherently higher signal-to-noise ratios. The cases at  $Re = 3.8$  and  $5 \times 10^5$  exhibit the smallest values of  $CV_i$ , indicating the highest relative measurement precision. However, it should be noted that a low CV reflects only the precision—that is, the spread or random uncertainty of the measurements—and does not account for possible systematic errors, or constant offsets, that may affect accuracy.

At  $Re = 5 \times 10^5$ ,  $\alpha = 5.7^\circ$  and  $\beta = -20, 0$  and  $20^\circ$  measurements were made three times to check the repeatability. For each of these measurements, the standard deviation within these repeated measurements  $\sigma_{rm}$  is shown in Table 4. The authors conclude that the measurement repeatability is overall high by comparing the orders of magnitude of the averaged standard deviation,  $1 \times 10^{-1}$ , and the repeatability standard deviation,  $1 \times 10^{-4}$ . Smaller uncertainties show for  $\beta = 0^\circ$ , affecting the lift coefficient  $C_L$  and the pitching moment  $C_{M,y}$  the most.

**Table 4.** Standard deviations of the repeatability measurements  $\sigma_{rm}$  for three  $\beta$  values taken with  $\alpha = 5.7^\circ$ .

|           | $\sigma_{rm} \times 10^{-4}$ |                   |                    |
|-----------|------------------------------|-------------------|--------------------|
|           | $\beta = -20^\circ$          | $\beta = 0^\circ$ | $\beta = 20^\circ$ |
| $C_L$     | 2.793                        | 0.699             | 2.562              |
| $C_D$     | 0.076                        | 0.085             | 0.014              |
| $C_S$     | 0.085                        | 0.030             | 0.300              |
| $C_{M,x}$ | 1.903                        | 1.030             | 2.585              |
| $C_{M,y}$ | 7.034                        | 1.899             | 6.254              |
| $C_{M,z}$ | 0.222                        | 0.120             | 0.766              |

### 3.2 Effect of forced boundary layer transition

The measured aerodynamic force coefficients with and without zigzag tape are plotted in Fig. 7 for  $\beta = 0^\circ$  and  $\alpha = 9.4^\circ$ , excluding the  $Re = 6.1 \times 10^5$  case due to missing data. In addition to the mean values, a confidence interval (CI) is plotted, indicating with 99% certainty that the mean lies within the given range. As detailed in Sec. 2.4, the load balance records data over a 10 s time interval, thereby capturing between 125 and 625 fluid parcels passing through. The resulting samples are regarded as temporally correlated; one supporting argument is that each fluid element traverses the measurement region over 16 to 80 ms, while data are sampled at much finer 0.5 ms intervals. To accurately estimate the sample measurement uncertainty of this correlated time series, the heteroskedasticity and autocorrelation-consistent (HAC) estimator by Newey and West (1987) is employed. The method requires an estimate of the time lag. A time lag of 11 samples was found from taking the integer value of  $N_{\text{samples}}^{\frac{1}{4}}$  (Greene, 2019).

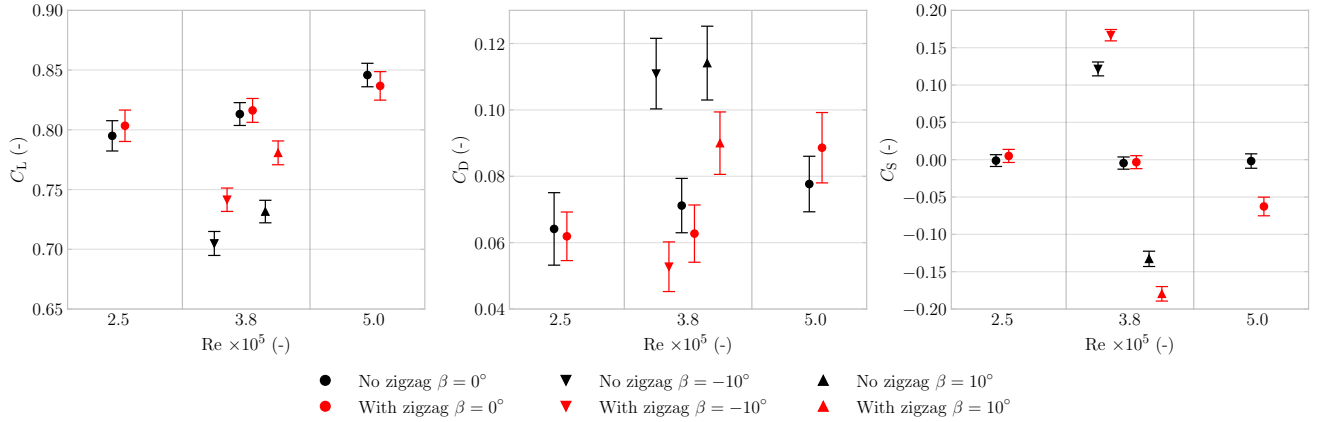

**Figure 7.** Aerodynamic force coefficients plotted with standard deviation, with and without zigzag tape, at  $Re = 1.3, 2.5, 3.8$  and  $5 \times 10^5$ , at an averaged corrected  $\alpha = 9.4^\circ$ .

From For context, the theoretical analysis leading to Fig. 6, it was concluded indicated that a zigzag tape height of 0.2 would not be sufficient to force the flow to 0.2 mm would be insufficient to force transition at  $Re = 2.5 \times 10^5$ , that it might be marginally sufficient at  $3.8 \times 10^5$ , and is sufficient at  $5 \times 10^5$ . The three horizontally separated regions in Fig. 7 correspond to these different  $Re$ , with black and red symbols indicating measurements obtained without and with zigzag tape, respectively. At  $\beta = 0^\circ$ , adding zigzag tape resulted in higher lift and lower drag are observed for  $Re = 2.5$  and  $3.8 \times 10^5$ , and whereas the opposite trend is found for was observed at  $Re = 5 \times 10^5$ , including a  $\pm 2\%$   $\pm 12\%$  increase in drag. This result at  $Re = 5 \times 10^5$  latter observation is consistent with findings in the literature, where the introduction of zigzag tape led to decreased lift and increased drag (Gahraz et al., 2018; Zhang et al., 2017a, b; Dollinger et al., 2019).

Definitive conclusions cannot be drawn for the non-zero sideslip cases, where data is limited to  $Re = 3.8 \times 10^5$  at  $\alpha = 9.4^\circ$  for  $\beta = \pm 10^\circ$ . Nonetheless, based on the measured increase in lift and side force, along with an observed 50% reduction in drag, the authors hypothesize that, in the sideslip configuration, the zigzag tape may locally promote  
315 a laminar-to-turbulent transition that delays flow separation.

Without zigzag tape and ~~in~~-under sideslip, the measured  $C_S$  value ~~is~~-remains near zero, independent of  $Re$ . ~~However~~In contrast, with zigzag tape, a negative  $C_S$  is observed at  $Re = 5 \times 10^5$ . ~~The difference, also visible in  $C_L$  and  $C_D$ , This difference~~ suggests that the zigzag tape introduces a setup asymmetry, possibly due to imperfect tape application.

### 320 3.3 Reynolds number effects

Figure 8 ~~shows~~-presents the measured force and moment coefficients as functions of  $\alpha$  for ~~the different values of various~~  $Re$ . ~~With increasing~~In the measurements, the lift coefficient  $C_L$  increases with  $Re$ , ~~the measurements show a converging trend and decreasing variation, consistent with the decreasing uncertainty observed in Table 3. Furthermore, the aerodynamic performance of the wing improves with  $Re$ , i.e., higher  $C_L$  and lower  $C_D$ , a trend~~  
325 ~~that can~~ but so does the drag coefficient  $C_D$ , resulting in a  $C_L/C_D$  ratio that does not show a consistent increasing trend with  $Re$ , except for the  $Re = 6.1 \times 10^5$  case. This finding contrasts with the 3D numerical simulations of Viré et al. (2022), in which both an increase in lift and a decrease in drag were observed from  $Re = 1 \times 10^5$  to  $1 \times 10^6$ , leading to higher  $C_L/C_D$  with increasing  $Re$ . The absence of a similar trend in the present measurements ~~may~~ be attributed to ~~decreasing boundary layer thickness~~(Folkersma et al., 2019), ~~the smaller range of  $Re$  realised~~  
330 ~~experimentally, differences in canopy thickness, and/or drag underprediction in the simulations, as discussed in Sect. 4.~~

The  ~~$Re = 1.3 \times 10^5$~~  $Re = 1.3 \times 10^5$  case exhibits the ~~largest variations due to the less favorable~~least smooth curves, ~~attributable to a less favourable~~ signal-to-noise ratio, i.e., ~~relatively smaller load magnitudes~~the load magnitudes ~~are relatively small~~ compared to the ~~measurement precision and~~ support-structure loads. The  $C_L$ - $\alpha$  plot suggests  
335 that, compared to higher  $Re$ , ~~there may already be stall development~~stall development may occur at lower angles, ~~as evidenced by the earlier decrease in slope of the  $C_L$ - $\alpha$  curve for  $Re = 1.3 \times 10^5$ , indicating reduced lift growth, and hence the possible onset of local flow separation.~~ This aligns with aerodynamic theory predicting earlier separation in laminar flows due to lower sensitivity to adverse pressure gradients (Anderson, 2016). ~~Developing stall would also explain the increased fluctuations at higher  $\alpha$ , particularly in  $C_S$  and the moment coefficients.~~

~~The~~Although small in magnitude, the non-zero values of  ~~$C_S$  indicate  $C_{M,x}$  and  $C_{M,z}$  may have indicated~~ an asymmetry in the setup. ~~This is further reflected in the moment coefficients  $C_{M,x}$  and  $C_{M,z}$ , which both vanish under perfectly symmetric conditions. The results for  $Re = 3.8 \times 10^5$  and  $5 \times 10^5$  agree well, particularly the lift and drag coefficients, which both follow anticipated trends with increasing  $\alpha$ . For coefficients of smaller magnitude, the non-smoothness of the curves was amplified, which was consistent with the higher relative uncertainties found, as~~  
340

345 indicated by the coefficient of variation in Table 3. The pitching moment coefficient  $C_{M,y}$  also shows a consistent increase as exhibited an increasing trend with increasing  $\alpha$  rises.

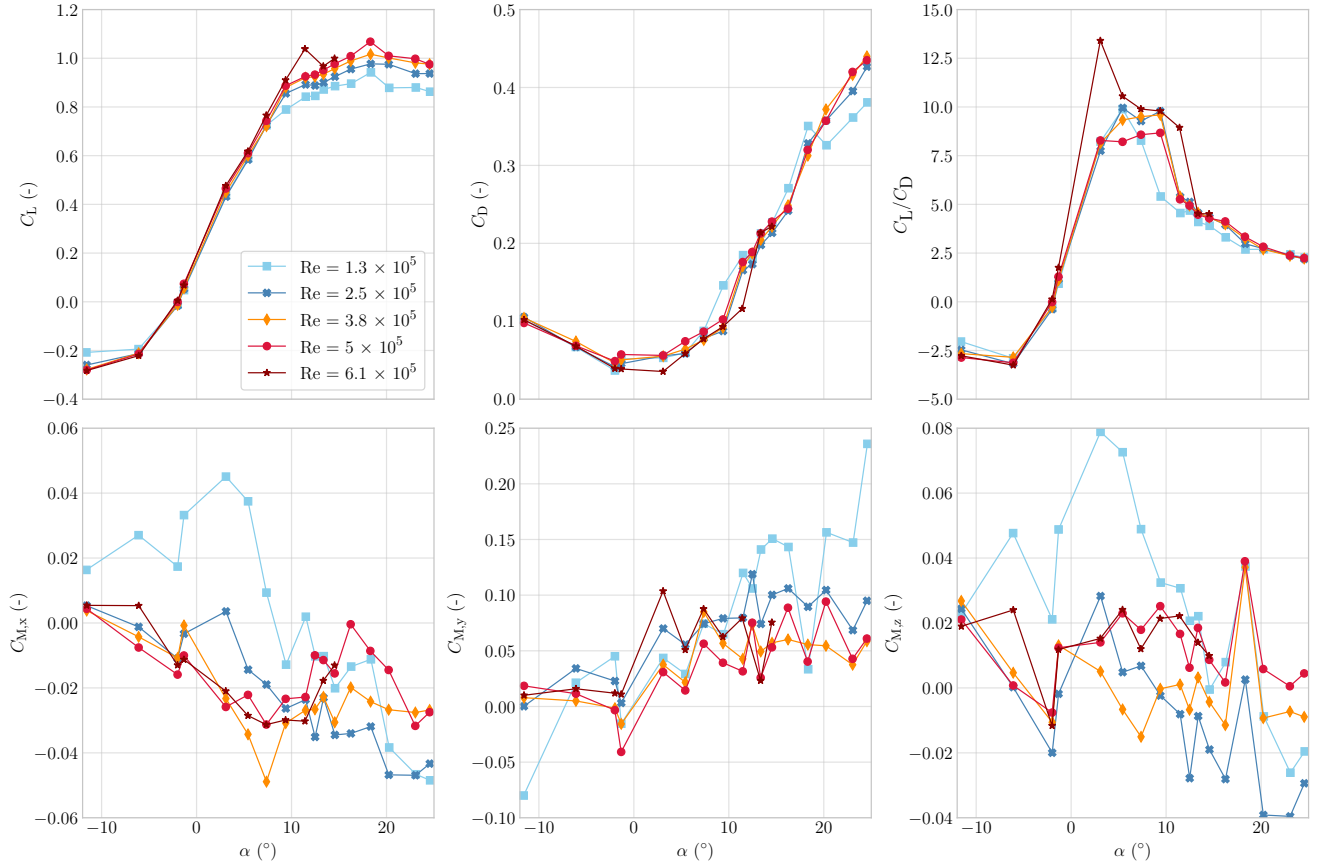

**Figure 8.** Aerodynamic force and moment coefficients plotted against  $\alpha$  for  $Re$  varying from  $1.3 \times 10^5$  to  $6.1 \times 10^5$  at  $\beta = 0^\circ$ .

When examining the influence of  $\beta$ , as shown in Fig. 9 for  $\alpha = 7.4^\circ$ , the largest deviations are observed at  $Re = 1.3 \times 10^5$ , followed by  $Re = 2.5 \times 10^5$ . As  $Re$  increases, the results tend to converge, and the differences between the polars become less pronounced. For  $\alpha$ , was examined at  $\alpha = 7.4^\circ$ , as this condition most closely resembled the average angle of attack of  $8^\circ$  observed during the reel-out phase of a V3 kite flight (Cayon et al., 2025). A perfectly symmetric setup, the would yield coefficients  $C_L$ ,  $C_D$ , and  $C_{M,y}$  would be  $C_{M,y}$  symmetric about  $\beta = 0^\circ$ , while and coefficients  $C_S$ ,  $C_{M,x}$ , and  $C_{M,z}$  would be antisymmetric. However, because of  $C_{M,x}$  and  $C_{M,z}$  antisymmetric. In practice, slight asymmetries in the actual setup, small deviations occur. Most notably the experimental setup caused small deviations from this ideal symmetry, notably non-zero values of  $C_S$ ,  $C_{M,x}$ , and  $C_{M,z}$  at  $\beta = 0^\circ$ , as well as minor asymmetries in of  $C_L$ ,  $C_D$ , and  $C_{M,y}$   $C_{M,y}$  about the vertical axis. The largest

350

355

deviations from ideal symmetry were observed at the lowest  $Re = 1.3 \times 10^5$ , with overall increasing symmetry as  $Re$  increased.

As also evident in Fig. 8, the  $C_L$  plot reveals an overall trend of improving aerodynamic performance increase in lift coefficient with increasing  $Re$ , consistent with the findings when varying  $\alpha$ . Notably, around  $\beta = 8^\circ$ , the  $C_S$  curve exhibits both positive and negative peaks, suggesting a non-linear relationship with  $\beta$ . At this same angle, a local maximum is observed in  $C_{M,x}$  for the  $Re = 5 \times 10^5$  case, and off-trend behavior shows for  $C_D$  and  $C_{M,z}$ . Similar off-trend behavior near  $\beta = \pm 8^\circ$  also appears in  $\beta$  sweeps at other values of  $\alpha$ . The potential underlying causes of this phenomenon are examined further in Sect. 4.

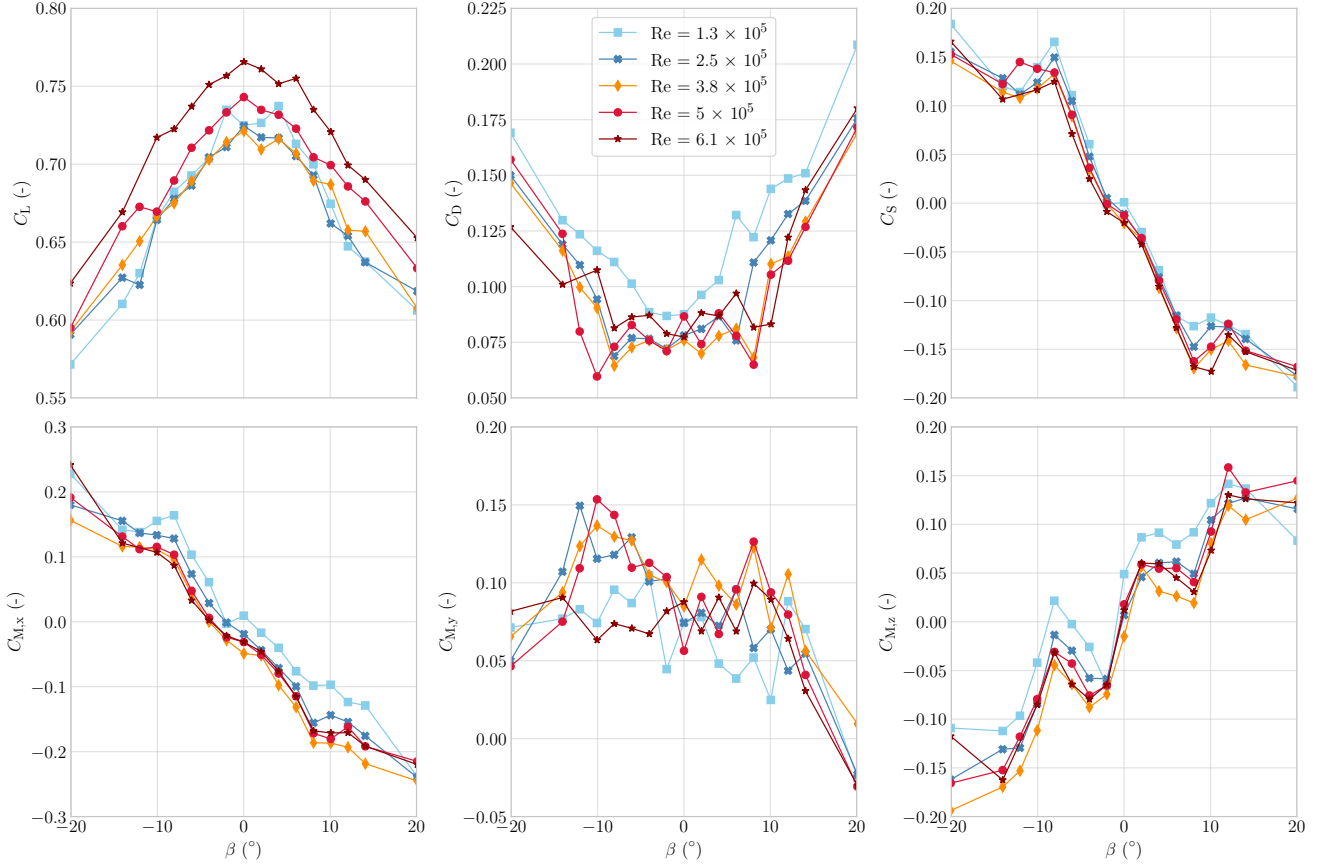

**Figure 9.** Aerodynamic force and moment coefficients plotted against  $\beta$  for  $Re$  varying from  $1.3 \times 10^5$  to  $6.1 \times 10^5$ , at  $\alpha = 7.4^\circ$ .

Among the tested cases with complete measurement sets,  $Re = 5 \times 10^5$  represents the highest Reynolds number and is therefore the closest to actual in-flight operational conditions, which range between  $Re = 23 \times 10^5$  and  $45 \times 10^5$  (Cayon et al., 2025). Consequently, this case is used as the basis for comparison with the numerical simulations. Additional arguments for choosing this specific measurement run are the low measurement uncertainty, as indicated



by the  $CV_i$  values in Table 3, its high repeatability demonstrated in Table 4, and the high degree of symmetry and antisymmetry in the positive and negative  $\beta$  measurements.

## 370 4 Discussion

Since the primary objective of the wind tunnel campaign was to generate validation data for numerical models, the measured aerodynamic characteristics were compared to characteristics obtained from several different aerodynamic computational studies of the V3 kite. One suitable data source is the Reynolds-averaged Navier-Stokes (RANS) CFD analysis by Viré et al. (2022), which is also the origin of the surface geometry employed in the present study.

375 The closest corresponding simulation case in terms of Reynolds number is at  $Re = 10 \times 10^5$ , for which force data are available from both an  $\alpha$  sweep at  $\beta = 0^\circ$  and a  $\beta$  sweep at  ~~$\alpha = 13^\circ$~~   $\alpha = 13.02^\circ$ . The reported  ~~$C_S$~~   $C_s$  values differ from those ~~reported in Viré et al. (2022) as we are using the platform area  $A$ , see Table 1, of the wing for the non-dimensionalization of the side force, as opposed to the~~ presented by Viré et al. (2022), as they were corrected by a factor of 3.7. This correction factor corresponds to the ratio of the projected side area that was used. For

380 ~~this reason, we applied the area ratio of 3.7 as a correction factor to the values of  $C_S$  reported in Viré et al. (2022). Furthermore, since~~ used by Viré et al. (2022) to the planform area  $A$  adopted in the present study. It was applied to enable consistent comparison between the aerodynamic force and moment coefficients. Furthermore, as a new axis system has been adopted, the orientation has been reversed; that is, values are were positive in (Viré et al., 2022) are negative in the present convention. Since RANS CFD is generally considered unsuitable for accurate modeling

385 of unsteady separated flows (Speziale, 1998), the post-stall residuals were examined to assess the validity of the solution. Compared to the pre-stall cases, the post-stall results exhibited larger residuals, with values ranging from  $1.0 \times 10^{-5}$  to  $2.2 \times 10^{-5}$ , rather than remaining below  $1.0 \times 10^{-6}$  as observed in pre-stall conditions. Nevertheless, these data points were retained in the analysis due to their relevance to the overall aerodynamic behavior.

A second data source is the RANS CFD analysis by Viré et al. (2020) of the same wing, but without struts.

390 This study provides force data over an  $\alpha$  sweep at  $Re = 5 \times 10^5$ . As shown by Viré et al. (2022), the struts have only a negligible impact on the integral force coefficients of the 3D wing. For both CFD datasets from Viré et al. (2020, 2022), it was determined that the geometry file contained a  $1.02^\circ$  offset in the angle of attack, defined as the angle between the mid-span chord line and the apparent wind vector. Therefore, the numerical data presented here ~~have been corrected by shifting the angle of attack values by this offset.~~ were corrected by applying this

395 angle-of-attack offset; further details are provided in Appendix F.

The third computational dataset was generated in the present study using a Vortex-Step Method (VSM), which is a lifting-line type of method. The VSM code, originally developed by Cayon et al. (2023), was adapted for the present comparisons; for details, see Poland et al. (2025). For each simulation, the angle of attack was incremented in steps of  $1^\circ$ , and a convergence analysis confirmed that discretizing the wing into ~~200 spanwise panels is~~ 150

400 spanwise panels was sufficient. The VSM relies on 2D airfoil polars as input. In previous studies, these polars were

constructed using aerodynamic load correlations derived from a large set of CFD simulations (Breukels, 2011). In the present work, however, more accurate polars are employed, obtained from dedicated 2D RANS CFD simulations; ~~the differences and simulation setup are discussed in detail in (Poland et al., 2025).~~

To ensure that ~~our~~ the numerical tools accurately represent real-world flight conditions, it is essential to characterize the range of inflow angles encountered during kite operation. ~~The experimental data indicate~~ In-flight measurements (Schelbergen et al., 2024) were analysed by Cayon et al. (2025), who found that the angle of attack  $\alpha$  of the 3D wing ~~averages around 1~~ averaged around 1° during the reel-in phase and approximately ~~88°~~ during the reel-out phase ~~(Cayon et al., 2025)~~. Additionally, observed sideslip angles  $\beta$  typically range between  $-10$  to  $10^\circ$  (Oehler et al., 2018). ~~The forthcoming comparison of simulations and measurements should be interpreted in light of these respective operating ranges and differences in canopy thickness; specifically, the scale model featured a thicker canopy, which may have contributed to increased drag and lift.~~

#### 4.1 Force comparison

In Fig. 10, the force coefficients  $C_L$ ,  $C_D$  and  $L/D$  are plotted against  $\alpha$ , for the VSM, CFD and wind tunnel (WT) data, along with 99% CI bands, evaluated using the autocorrelation-consistent method by Newey and West (1987). The CI band is rather narrow for  $C_L$  compared to the mean values, indicating high certainty. For  $C_D$ , the band is slightly wider, aligning with the difference in the CV listed in Table 3. The numerical data match the measured lift coefficient trend well from  $\alpha = -11$  to around  $11^\circ$ . Above  $\alpha = 11^\circ$ , the numerical VSM predicts lower lift whereas the RANS CFD predicts higher lift. The differences in numerical predictions are considered to arise, in part, from discrepancies in turbulence modeling. The VSM employs fully turbulent two-dimensional RANS CFD as input, whereas the three-dimensional RANS CFD simulations incorporate a transition model.

The numerical and measured drag coefficients start deviating by more than a factor of two above around  $\alpha = 10^\circ$ , where the lift slope also changes. The CFD predictions with and without struts agree well and show the expected change in drag slope when entering the stall regime. This effect is not reproduced by the VSM to the same extent, attributed to inherent limitations of lifting-line-based methods in this regime (Phillips and Snyder, 2000), e.g., its inviscid nature. For angles of attack above ~~55°~~ 55°, the VSM consistently ~~underestimates~~ underestimated the drag coefficients compared to the measurements, which may in part have been caused by not modelling the struts and by the use of a thinner canopy.

From  $\alpha = 1$  to  $10^\circ$ , the measured lift-to-drag ratio plateaus at the maximum value range between  $L/D = 8$  and  $9$ , sharply dropping outside this  $\alpha$  range. All numerical models predict a higher maximum  $L/D$ : the CFD simulations reach a value of  $10.5$  at  $\alpha = 9^\circ$ , while the VSM predicts ~~an even higher a~~ a maximum of  $14$  at  $\alpha = 10^\circ$ . ~~Measured lift and drag coefficients, and their ratio, together with coefficients computed with VSM and RANS CFD (Viré et al., 2020, 2022), plotted against  $\alpha$  at  $\beta = 0$ . Measured lift, drag and side force coefficients, together with coefficients computed with VSM and RANS CFD Viré et al. (2022), plotted against  $\beta$ .~~

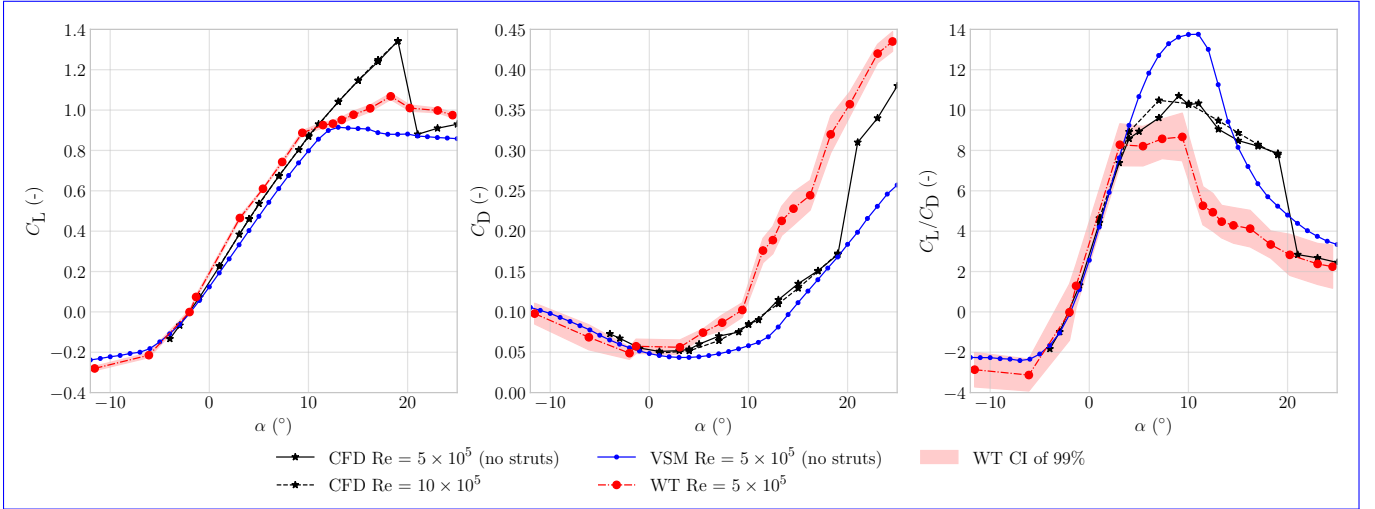

**Figure 10.** Measured lift and drag coefficients, and their ratio, together with coefficients computed with VSM and RANS CFD (Viré et al., 2020, 2022), plotted against  $\alpha$  at  $\beta = 0^\circ$ .

In Fig. 11, the force coefficients  $C_L$ ,  $C_D$  and  $C_S$  are plotted against  $\beta$  for a low and high  $\alpha$ . CFD data was only  
435 available at a different angle of attack,  ~~$\alpha = 13^\circ$~~   $\alpha = 13.02^\circ$ , but is included in the top row of the plot to enable trend comparison. Furthermore, the WT data is plotted for both positive and negative  $\beta$  ranges to illustrate the effect of the asymmetric measurement setup, e.g., due to geometry, surface condition, or inflow.

The measurements confirm and closely follow the trends predicted by the numerical simulations. With increasing side slip angle,  $C_L$  decreases, while  $C_D$  and the absolute value of  $C_S$  both increase. The measured data at negative  
440  $\beta$  form an exception, showing an off-trend lift, drag, and side force behavior above around  $\beta = 8^\circ$ . This off-trend behavior appears across multiple Re values, as shown in Fig. 9, and is smaller for the lower  $\alpha$  case. Since it is this behaviour was not observed in the CFD or VSM predictions, ~~a possible reason could be flow separation caused by imperfections in the~~ and as an increase in lift and side force and a decrease in drag were measured, it suggests the presence of local separated flow in the positive  $\beta$  case and attached flow in the negative  $\beta$  case. These differences are  
445 attributed to asymmetry in the measurement setup and ~~the wind tunnel surface imperfections on the scale~~ model.

## 4.2 Moment comparison

The moment coefficients  $C_{M,x}$ ,  $C_{M,y}$  and  $C_{M,z}$  are plotted over an  $\alpha$  sweep in Fig. 12. Compared to the force measurements, the confidence intervals are wider due to higher measurement uncertainty, the same conclusion as drawn from analyzing CV shown in Table 3. No CFD data is available; therefore, only VSM data is used. The  
450 numerical data predicts no roll or yaw moment, where the measurements do show, on average, a negative roll moment coefficient  $C_{M,x}$  and a positive yaw moment coefficient  $C_{M,z}$ , indicating asymmetries in the setup. The experimental pitch moment coefficients  $C_{M,y}$  fluctuate significantly, yet on average exhibit a positive slope. The

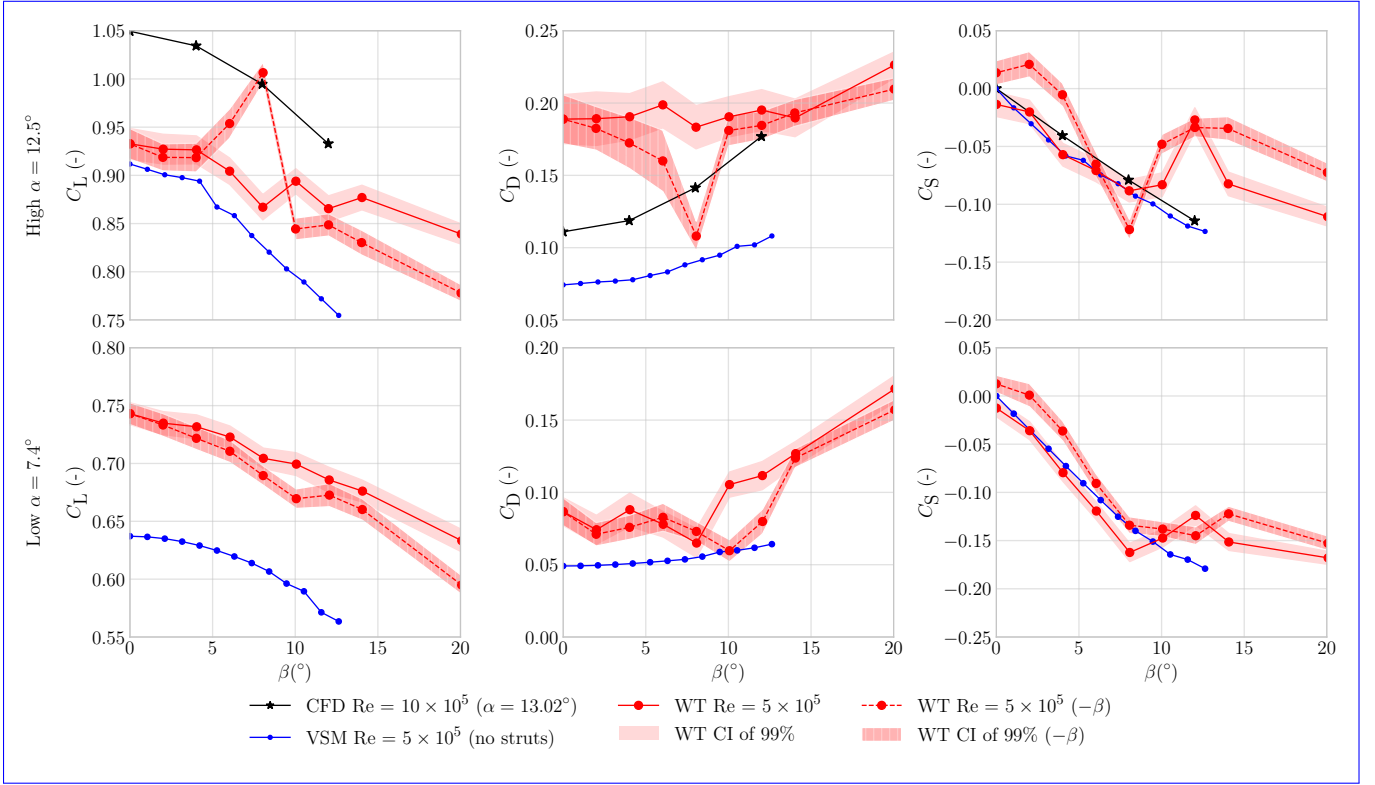

**Figure 11.** Measured lift, drag and side force coefficients, together with coefficients computed with VSM and RANS CFD Viré et al. (2022), plotted against  $\beta$ .

numerical predictions differ in magnitude but exhibit a similar positive and increasing moment trend up to the stall point.

455 In Fig. 13, the moment coefficients  $C_{M,x}$ ,  $C_{M,y}$  and  $C_{M,z}$  are plotted over an  $\beta$  sweep. Similar to the forces, the measured moments differ between positive and negative  $\beta$  ranges. The numerical and experimental data match well for the roll moment coefficient  $C_{M,x}$ . Less agreement in trend shows for the pitch moment coefficient  $C_{M,y}$ , where the measurements indicate an increasing moment up to  $\beta = 10^\circ$  and above this threshold a decreasing moment. The VSM, on the other hand, predicts a higher value that changes less with increasing  $\beta$ . For the yaw moment coefficient

460  $C_{M,z}$ , the measurements and numerical predictions show opposite trends; it is unclear why this is the case. ~~Some possible~~ The currently measured positive slope suggests that the anhedral kite shape was not yaw statically stable, which is counterintuitive given its anhedral geometry, and contrary to the findings of Belloc (2015), where a negative slope was measured for an anhedral rigidised paraglider in wind tunnel experiments. Possible factors contributing to this are the ~~the discrepancy include~~ observed setup asymmetry, a misprediction in the aerodynamic force produced at the tips, high uncertainty as shown in Table 3, and a low signal-to-noise ratios ~~shown~~, as presented in Fig. D1 in App. D.

465

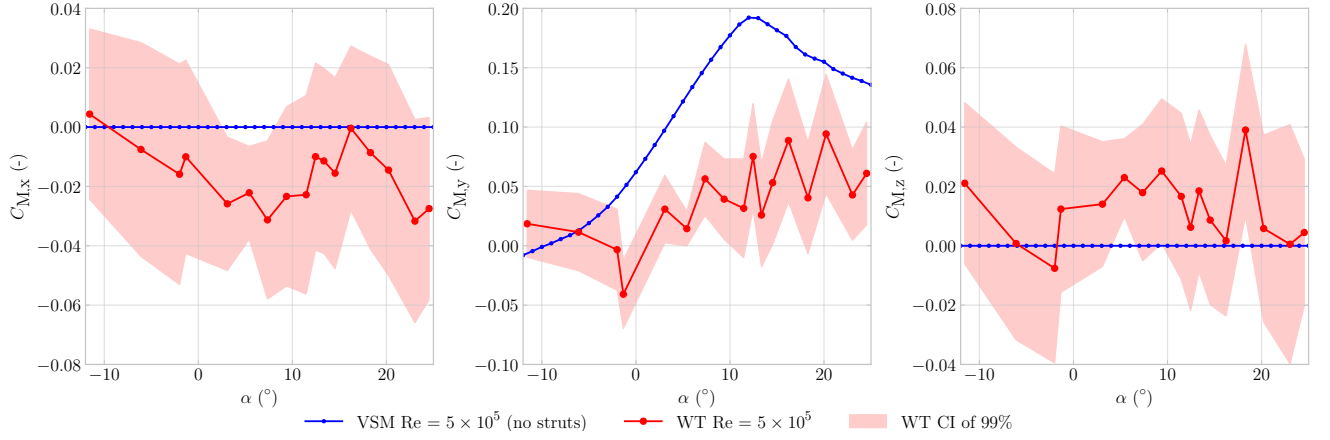

**Figure 12.** Measured and computed moment coefficients as functions of  $\alpha$  at  $\beta = 0^\circ$ .

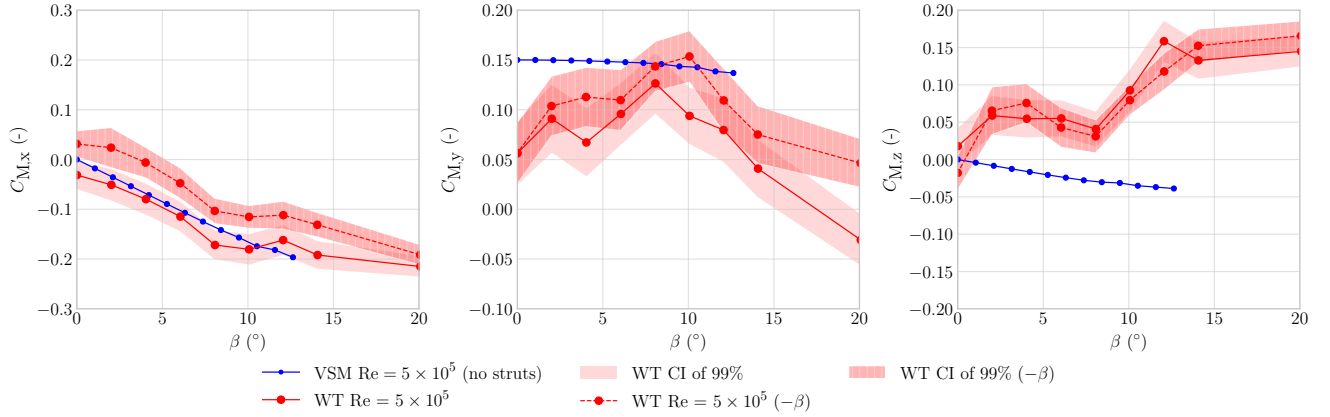

**Figure 13.** Measured moment coefficients together with coefficients computed with VSM simulations, plotted against  $\beta$ , for  $\alpha = 7.4^\circ$ .

## 5 Conclusions

This paper presents a wind tunnel investigation of a leading-edge inflatable (LEI) kite, designed as a benchmark case to validate numerical models for airborne wind energy applications. To avoid scaling issues caused by aero-structural deformation, a 1:6.5 rigid scale model of the TU Delft V3 kite was used. The same ~~idealized geometry with fillets, as used in idealised geometry as that used in the~~ numerical studies, ~~was employed to aid validation except for a thicker canopy, was employed.~~ The experiments were conducted in the Open-Jet Facility at TU Delft, with wind tunnel corrections applied ~~to primarily~~ primarily to account for downwash effects.

~~Consistent with findings from previously published 2D simulations, the experimental measurements demonstrate an improvement in aerodynamic performance, i.e. an increase in lift and a reduction in drag, as the Reynolds number increases from  $1.3 \times 10^5$  to  $5 \times 10^5$ .~~

A zigzag tape was applied to replicate the aerodynamic effect of the stitching seam that connects the canopy to the leading-edge tube. Its height was selected based on theoretical criteria to induce boundary layer transition. At a Reynolds number of  $5 \times 10^5$ , the addition of the zigzag tape led to a reduction in lift and an increase in drag, aligning with trends reported in the literature. Despite the limited data and kites typically operating at higher Reynolds numbers, the findings suggest that the suction side stitching seam negatively affects the aerodynamic performance.

In the nominal operating regime, the experimental data confirm the lift and side force predictions made by the VSM simulations conducted in this study, as well as by previously published RANS CFD simulations. Between 0 and  $10^\circ$  angle of attack, the lift-to-drag ratio  ~~$L/D$~~  remains nearly constant, between 8 and 9. This behavior deviates from conventional wing aerodynamics and warrants careful consideration in kite simulations, as current numerical models are unable to capture the nearly constant trend, likely due to an underestimation of drag in the relevant flow regime. The remaining differences are attributed primarily to possible misprediction of the flow behind the circular leading-edge tube and to the simulation of a canopy with reduced thickness.

Within the nominal sideslip range, from  $-10$  to  $10^\circ$ , the experimental results confirm the numerical side force predictions. Given that sideslip conditions inherently arise during turning maneuvers, and that side force plays a critical role in initiating and sustaining such motions, the observed agreement suggests there is aerodynamic potential within the presented numerical models for accurately predicting steering behavior.

The measurements and simulations ~~differ~~ differed substantially outside the nominal ~~operating ranges in~~ angle of attack and sideslip operating ranges. This discrepancy is partly attributed to differences between the wind tunnel conditions and the simulated environment, but also due to the decreasing accuracy of the employed numerical predictions beyond the onset of stall. While the discrepancies indicate potential areas for model refinement, they are not inherently detrimental to accurately predicting kite aerodynamic loads, as they primarily occur outside the nominal operating envelope.

Although this study provides a rigorous evaluation and benchmarking of numerical models through direct comparison with carefully acquired experimental data, the simulations are not yet considered fully validated. Strict validation

would require comprehensive assessment across multiple geometries, operating conditions, and Reynolds numbers, as well as resolution of the identified limitations to ensure reliable predictive capability across the full operational envelope.

505 The reported measured values will differ from those of a real kite, as an ~~idealized shape was analyzed and structural deformations were neglected~~idealised shape was analysed. The actual kite geometry, lacking edge fillets and ~~including~~incorporating a bridle line system, will likely exhibit higher drag. Furthermore, structural deformations such as canopy billowing ~~will and unsteady aerodynamic loads will further~~ alter the aerodynamic ~~performance~~response.

510 Future work should investigate the causes of the measured asymmetry and aim to reduce uncertainty in moment measurements. To study transition and the influence of the stitching seam in more detail, more refined measurement techniques, e.g. infrared thermography, are recommended. For improved numerical validation, CFD simulations should be conducted at all measured Reynolds numbers and inflow angles, including moment predictions. A particle image velocimetry study was already conducted to analyze the flow fields and enhance understanding. The manuscript is under production and will be published as a companion paper.

*Code and data availability.* The geometric mesh of the TU Delft V3 kite is available on Zenodo from <https://doi.org/10.5281/zenodo.15316036> and through [https://awegroup.github.io/TUDELFT\\_V3\\_KITE/docs/datasets.html](https://awegroup.github.io/TUDELFT_V3_KITE/docs/datasets.html). The wind tunnel measurements are available on Zenodo from <https://doi.org/10.5281/zenodo.14288467>. The code for the analysis of this data and the generation of the tables and diagrams in this paper is available on Zenodo from <https://doi.org/10.5281/zenodo.14930182> and GitHub from Zenodo <https://doi.org/10.5281/zenodo.15316684> or directly through GitHub [https://github.com/jellepoland/WES\\_load\\_wind\\_tunnel\\_measurements\\_TUDELFT\\_V3\\_LEI\\_KITE](https://github.com/jellepoland/WES_load_wind_tunnel_measurements_TUDELFT_V3_LEI_KITE). This code uses the latest version of the Vortex Step Method (VSM) to perform simulations, available on GitHub: <https://github.com/ocayon/Vortex-Step-Method>.  
520

This paper includes verified computational reproducibility, confirmed through an independent CODECHECK process, which is an open science initiative to improve reproducibility (Nüst and Eglen, 2021). The certificate is accessible through: <https://doi.org/10.5281/zenodo.15603144>.

*Author contributions.* JAWP compiled the original manuscript, co-designed the experiment, executed the experiment, and performed the analysis. JMvS co-designed the experiment, executed the experiment, performed an initial analysis, and aided in developing figures. Both MG and RS supervised the project, reviewed the manuscript, and contributed to all sections.  
525

*Competing interests.* At least one of the (co-)authors is a member of the editorial board of Wind Energy Science.



*Acknowledgements.* The authors would like to thank the following people for their help: Erik Fritz and David Bensason assisted with the setup of the experimental data processing, and together with René Poland also assisted in the acquisition of the data. Delphine de Tavernier, for her advice on the planning of the experiment and the feedback on the manuscript. Frits Donker Duyvis, Peter Duyndam, and Dennis Bruikman together resolved all of the technical issues, e.g. cabling repairs. Fabien Schmutz enabled and executed the FARO laser tracker measurement. We would also like to thank Curveworks B.V. for providing a substantial discount and building an excellent scale model.

*Financial support.* This research has been supported by the Nederlandse Organisatie voor Wetenschappelijk Onderzoek (NWO) under grant number 17628. This work has partially been supported by the MERIDIONAL project, which receives funding from the European Union’s Horizon Europe Programme under the grant agreement No. 101084216. We acknowledge the use of OpenAI’s ChatGPT and Grammarly for assistance in refining the writing style of this manuscript.

## Appendix A: ~~Wind tunnel corrections~~ Statistical convergence of measurement period

A measurement duration of 10 s was selected based on the characteristic aerodynamic time scale of the system, defined as the time required for a fluid element to traverse the kite’s reference chord. For each tested condition, this corresponded to approximately 125 to 625 independent flow passages within the 10 s interval, depending on the free-stream velocity. This ensured that statistical averages were derived from a sufficiently large number of uncorrelated samples, thereby mitigating the influence of temporally correlated fluctuations.

To assess statistical convergence, key measurement conditions—namely  $\alpha = 5.7^\circ$  at  $U = 20 \text{ m.s}^{-1}$  and  $\beta = -20^\circ$ ,  $0^\circ$ , and  $20^\circ$ —were repeated three times. The close agreement in both mean and fluctuating load coefficients across these repetitions confirmed that a 10 s sampling window was adequate to obtain converged statistics under the present steady-state aerodynamic conditions. While longer sampling durations may be necessary for capturing slower or rare unsteady phenomena, the selected interval was found to be appropriate for the regime investigated.

To further substantiate this, a convergence analysis was performed using both running average and block analysis techniques. As shown in Fig. A1, these methods revealed only marginal fluctuations in the computed statistics over the 10 s window, thereby validating the statistical robustness of the chosen measurement duration.

## Appendix B: Wind tunnel corrections

### B1 Wind tunnel blockage

Two different effects contribute to the blockage of the flow in the wind tunnel, both affecting the dynamic pressure. There is solid blockage due to the frontal area of the wing and wake blockage arising from momentum loss in the wake downstream of the model. One can estimate the total blockage using the blockage factor, defined as the ratio between the model’s frontal area and the jet exit’s cross-sectional area (Mercker et al., 1997). With the kite set at

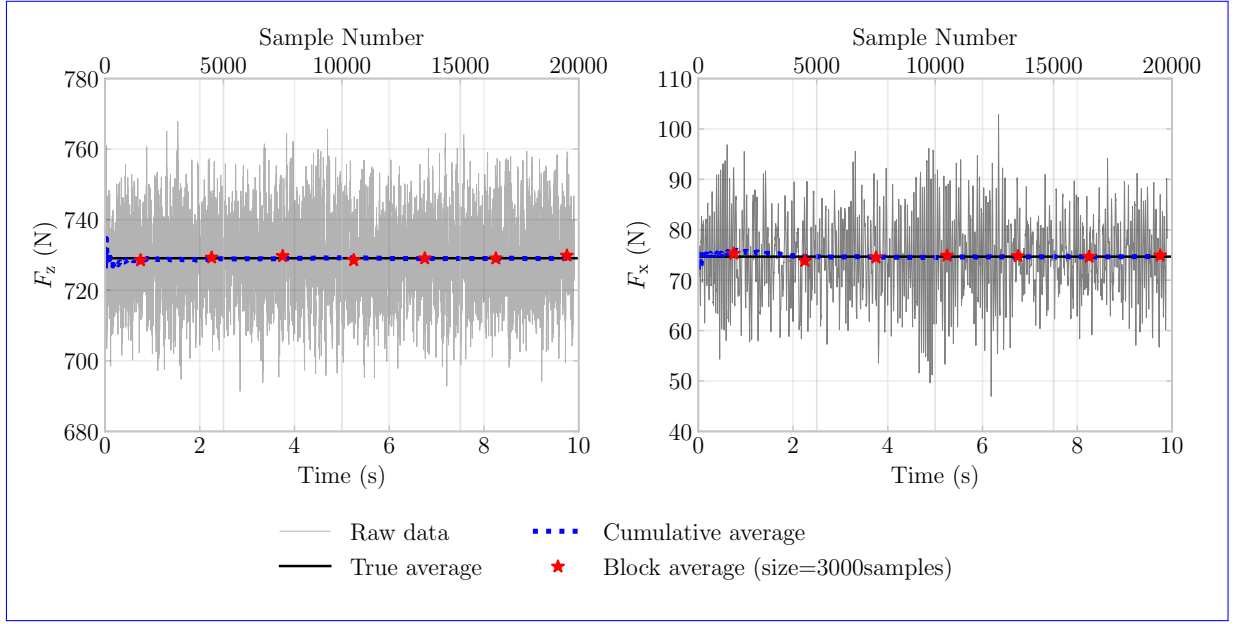

**Figure A1.** Running average and block average analysis of the 10 s, over a sample showing the forces in the z- and x-axis. Demonstrating that the selected period is sufficiently long to achieve a statistically converged average.

the maximum tested angle of attack of  $24^\circ$ , the projected frontal area  $S_f A_f$  at  $\alpha = 24^\circ$  is approximately  $0.2 \text{ m}^2$ . The octagonal wind tunnel opening has an area  $S_n = 7.47 \text{ m}^2$ , resulting in a blockage factor of 3%. For blockage factors  
560 below 10%, the open-jet wind tunnel correction model of Lock (1929) has been validated against CFD simulations (Collin, 2019), which states,

$$\frac{\Delta U}{U_\infty} = \tau \lambda \left( \frac{\underline{S_f} \underline{A_f}}{\underline{S_n} \underline{S_n}} \right)^{\frac{3}{2}}, \quad (\text{B1})$$

where  $\tau$  represents the tunnel shape factor of approximately 0.22, and  $\lambda$  the model shape factor of approximately 0.7, both calculated using the length-to-thickness ratio  $c_{\text{ref}}$  and  $h$ . The resulting velocity correction is approximately  
565 0.25%.

Barlow et al. (1999) presents another approximation form of the total blockage,

$$\epsilon_t \approx \frac{\underline{S_f} \underline{A_f}}{\underline{4S_n} \underline{4S_n}}, \quad (\text{B2})$$

with which one finds a correction of 0.67%.

As both methods result in values below 1%, the blockage effects are considered negligible. This aligns with the  
570 guidelines of Wickern (2014), which recommend keeping blockage factors below 5%, and Barlow et al. (1999), which advise a maximum of 7.5%.

## B2 Streamline curvature and downwash

The correction model described by Barlow et al. (1999) was used. Although not explicitly stated, it was likely developed for conventional planar wings. The swept-back, highly curved anhedral kite wing is non-planar. In the  
575 absence of open-jet tunnel corrections that take dihedral effects into account, the model was assumed valid.

Barlow et al. (1999) defines the total angle correction as the sum of a downwash correction  $\Delta\alpha$  and a streamline curvature correction  $\Delta\alpha_{sc}$  in rad,

$$\Delta\alpha_t = \Delta\alpha + \Delta\alpha_{sc}. \quad (\text{B3})$$

### B2.1 Downwash

580 The downwash angle correction  $\Delta\alpha$  in rad is calculated using,

$$\Delta\alpha = \delta \frac{A}{C} C_L, \quad (\text{B4})$$

where  $A = 0.462 \text{ m}^2$  represents the model reference area by which the model lift coefficient,  $C_L$ , is defined. The octagonal tunnel jet-exhaust crosssectional area is  $C = 7.47 \text{ m}^2$ . The variable  $\delta$  represents an empirically determined factor, given by Barlow et al. (1999) as a function of the wind tunnel geometry and the effective vortex span  $b_e$ . A  
585  $b_e \approx 0.79$  was found using,

$$b_e = \frac{b}{2} \left( 1 + \frac{b_v}{b} \right), \quad (\text{B5})$$

where the ratio of the vortex span  $b_v$  to geometric span  $b = 1.287 \text{ m}$  was found, from Fig. 10.11 on p. 382 in Barlow et al. (1999) using the taper ratio  $\lambda_t \approx 0.53$  and the aspect ratio of  $\approx 3.5$ .

Assuming a near-elliptical loading, the  $\delta$  for an octagonal jet can be approximated using the empirical relations  
590 of open circular-arc wind tunnel (Rosenhead, 1933; Batchelor, 1944; Gent, 1944). With a ratio of minor to major jet axes  $\lambda = 1$ , and the ratio of effective span to jet height  $k \approx 0.4$ , a  $\delta \approx -0.126$  was determined from Fig. 10.126 on p. 393 in Barlow et al. (1999).

### B2.2 Streamline curvature

The streamline curvature angle correction  $\Delta\alpha_{sc}$  in rad is related to the downwash angle correction,

$$\Delta\alpha_{sc} = \tau_2 \Delta\alpha \quad (\text{B6})$$

where  $\tau_2$  is an empirically determined factor dependent on whether the wind tunnel has an open or closed test section and the ratio between tail length  $l_t$  and tunnel width  $2R = 2.85 \text{ m}$ . Barlow et al. (1999) state that, for wings without a defined tail length, one can use a quarter of the chord length instead of the tail length, resulting in  $l_t \approx 0.10 \text{ m}$ . With a ratio of 0.035, one finds from Barlow et al. (1999, Fig. 10.37 on p. 400) a  $\tau_2 \approx 0.054$ . Because the streamline  
600 curvature angle correction has a magnitude of roughly 5.4% of the downwash angle correction, it is clear that the downwash correction dominates.

### B3 Total correction

Rewriting the equations and converting from rad to deg, the total angle and load corrections become

$$\Delta\alpha_t = (1 + \tau_2)\delta\frac{A}{C}C_L\frac{180}{\pi}, \quad (\text{B7})$$

$$\Delta C_D = \delta\frac{A}{C}C_L^2, \quad (\text{B8})$$

$$\Delta C_L = -\Delta\alpha_{sc}\frac{dC_L}{d\alpha}, \quad (\text{B9})$$

$$\Delta C_{M,y} = +0.125\Delta\alpha_{sc(2)}\frac{dC_L}{d\alpha}, \quad (\text{B10})$$

where  $\Delta\alpha_{sc(2)}$  denotes the streamline curvature correction computed using an  $l_t$  equal to half the chord length  $\tau_{2(2)} \approx 0.108$ . A value of  $\frac{dC_L}{d\alpha} \approx 0.1$  was derived from the experimental results.

Barlow et al. (1999) do not mention any application of their corrections towards the sideways  $y$ - direction. As the kite, under nonzero sideslip conditions, does produce a non-negligible side force, i.e. roughly 15% of the maximum lift, a downwash and curvature effect might be present. To quantify the effects, it is assumed that Barlow et al. (1999)'s method also holds for the sideways direction in the following form,

$$\Delta\beta_t = (1 + \tau_{2,s})\delta\frac{A}{C}C_S\frac{180}{\pi}, \quad (\text{B11})$$

$$\Delta C_D = \delta\frac{A}{C}C_S^2, \quad (\text{B12})$$

$$\Delta C_S = -\Delta\beta_{sc}\frac{dC_S}{d\beta}, \quad (\text{B13})$$

$$\Delta C_{M,z} = +0.125\Delta\beta_{sc(2)}\frac{dC_S}{d\beta}, \quad (\text{B14})$$

with  $\tau_{2,s} \approx 0.028$  and  $\tau_{2(2),s} \approx 0.056$ , calculated using the tip chord  $c_t = 0.212$  m. Because  $C_S$  is non-dimensionalized by the same area  $A$ , and to enable calculations, it is assumed that the same  $\delta \approx -0.126$  can be used. A value of  $\frac{dC_S}{d\beta} \approx 0.01$  was derived from the experimental results.

The resulting corrections, similar to the blockage corrections, are deemed negligible ~~when they induce less than 1% change at their maximum—corresponding, for example, to a 0.1 shift at a 10 angle. Under this criterion, the corrections  $\Delta C_L$ ,  $\Delta C_{M,y}$ ,  $\Delta C_S$ , and  $\Delta C_{M,z}$  are all negligible, each producing a maximum change of less than 0.1%.~~

~~An exception is the  $\Delta\beta_t$  correction, which, while still below 1%, approaches the threshold. For instance, in the case shown on the bottom row of Fig. 11, with  $C_S \approx 0.15$ , the computed correction is  $\Delta\beta_t \approx 0.068$ , representing approximately 0.97%.~~

~~The resulting corrections, similar to the blockage corrections, are deemed negligible if they induce less than 1% change at their maximum, e.g., a  $0.1^\circ$  change at  $10^\circ$  angle. This renders the  $\Delta C_L$ ,  $\Delta C_{M,y}$ ,  $\Delta C_S$  and  $\Delta C_{M,z}$  corrections negligible. An exception is  $\Delta\beta_t$ , which does not cause 1% change but comes close, e.g. taking the case on the bottom row of Fig. 11 one finds for a  $C_S \approx 0.15$ , a correction of  $\Delta\beta_t \approx 0.068^\circ$ , which given  $\beta \approx 7^\circ$  implies an 0.97% change.~~

**Table B1.** Corrections for angle, force, and moment coefficients.

| $\Delta\alpha_t$ (°) | $\Delta\beta_t$ (°) | $\Delta C_D$ (-)               |
|----------------------|---------------------|--------------------------------|
| $-0.47 C_L$          | $-0.46 C_S$         | $-0.0078 C_L^2 - 0.0078 C_S^2$ |

**Appendix C: Assessment of sensor drift**

To ensure consistent data from the load balance measurement device, described in Section 2.3 and shown in Fig. 2, sensor drift was evaluated through repeated measurements. Specifically, 30 s time interval measurements were taken each morning and evening over three consecutive days, corresponding to 12 h intervals. This procedure served to  
635 determine whether the drift was substantial enough to influence the results. The measurement drift over time is plotted in Fig. C1, with corresponding mean and standard deviation values reported in Table C1. On average, the standard deviation across the six components (three translational and three rotational) was approximately 1 N. During the experiment, a baseline measurement at near-zero wind speed was taken after each change in  $\alpha$ , followed

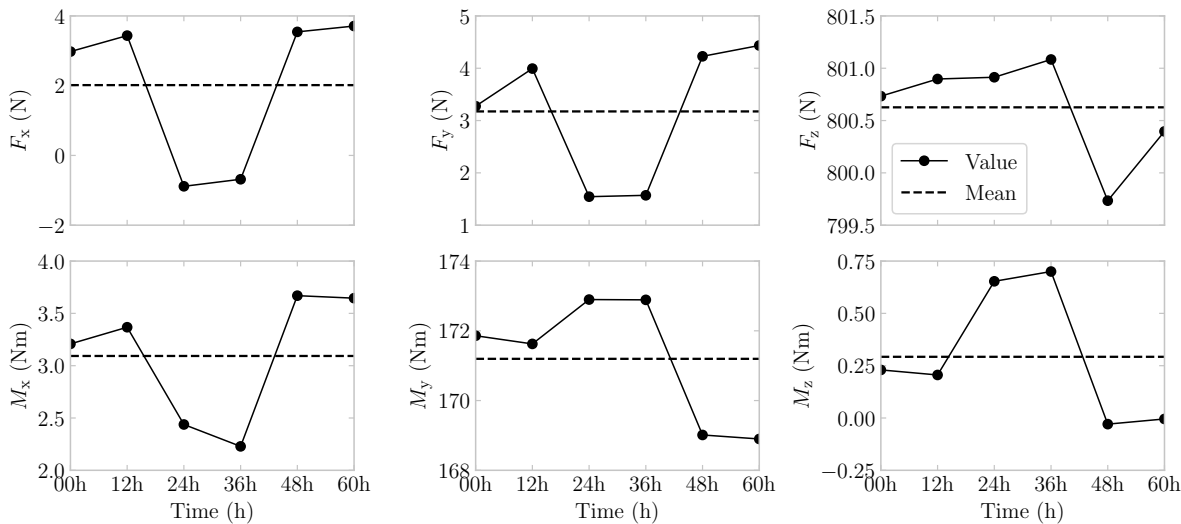

**Figure C1.** Sensor drift of the load balance for the three force components and three moments during the 60 h measurement time.

immediately by a measurement at non-zero  $U_\infty$ . The aerodynamic load was then obtained by subtracting the baseline  
640 from the flow-on measurement. Consequently, sensor drift only affects the resulting data if drift magnitudes occurring over the short interval between the two measurements are comparable to those observed over the 12 h drift assessment intervals.

**Table C1.** Sensor drift mean and standard deviation  $\sigma$  values

| Symbol | Unit             | Mean   | $\sigma$ |
|--------|------------------|--------|----------|
| $F_x$  | N                | 2.02   | 1.99     |
| $F_y$  | N                | 3.17   | 1.20     |
| $F_z$  | N                | 800.63 | 0.45     |
| $M_x$  | Nm <sup>-1</sup> | 3.09   | 0.56     |
| $M_y$  | Nm <sup>-1</sup> | 171.20 | 1.65     |
| $M_z$  | Nm <sup>-1</sup> | 0.29   | 0.29     |

## Appendix D: Support structure loads

To illustrate the relative contribution of the kite and support structure to the total measured loads, the proportions of the measured kite loads and support-structure loads are shown in Fig. D1 for a representative case at  $\text{Re} = 5 \times 10^5$  over a  $\beta$  sweep; see App. D. Defining the kite load as the signal and the support-structure load as the noise, this ratio serves as a proxy for the signal-to-noise ratio (SNR) and, thus, for measurement uncertainty.

The kite contribution dominates for  $C_L$ , indicating a high SNR and low associated uncertainty. In contrast, for  $C_D$ ,  $C_{M,y}$ , and  $C_{M,z}$ , the support-structure contributions are more significant, implying a lower SNR and correspondingly higher uncertainty.

For proportions in other cases, the reader is referred to the open-source code and open-access dataset, which allow the reproduction of these plots.

## Appendix E: Experimental setup vibration analysis

During the measurements, vibrations were observed and analyzed both qualitatively from video footage and quantitatively using force and moment data sampled at 2000 Hz; see Fig. E1. At  $\text{Re} = 6.1 \times 10^5$ , the vibrations were deemed potentially destructive under high  $\alpha$  and high  $\beta$ ; therefore, some of the intended experiments were not completed. The increasing vibration amplitudes suggest that a natural frequency of the structure or one of its sub-structures was excited, indicating resonance.

As an example, a 1 s data segment at  $U_\infty = 25 \text{ ms}^{-1}$ ,  $\alpha = 14^\circ$ , and  $\beta = 0^\circ$  is shown in Fig. E1, where the force data exhibit high-frequency oscillations, most notably in  $F_z$ , and the moment data display a resonant trend.

To investigate the resonance behavior observed during testing, the time series data were transformed into the frequency domain using a Fast Fourier Transform (FFT), and the Power Spectral Density (PSD) was computed using a periodogram function. The resulting PSD values were normalized to the range  $[0, 1]$  to enable comparison across different wind speeds. For each wind speed, frequency and normalized PSD values were computed for all six channels: three force components ( $F_x$ ,  $F_y$ ,  $F_z$ ) and three-moment components ( $M_x$ ,  $M_y$ ,  $M_z$ ).

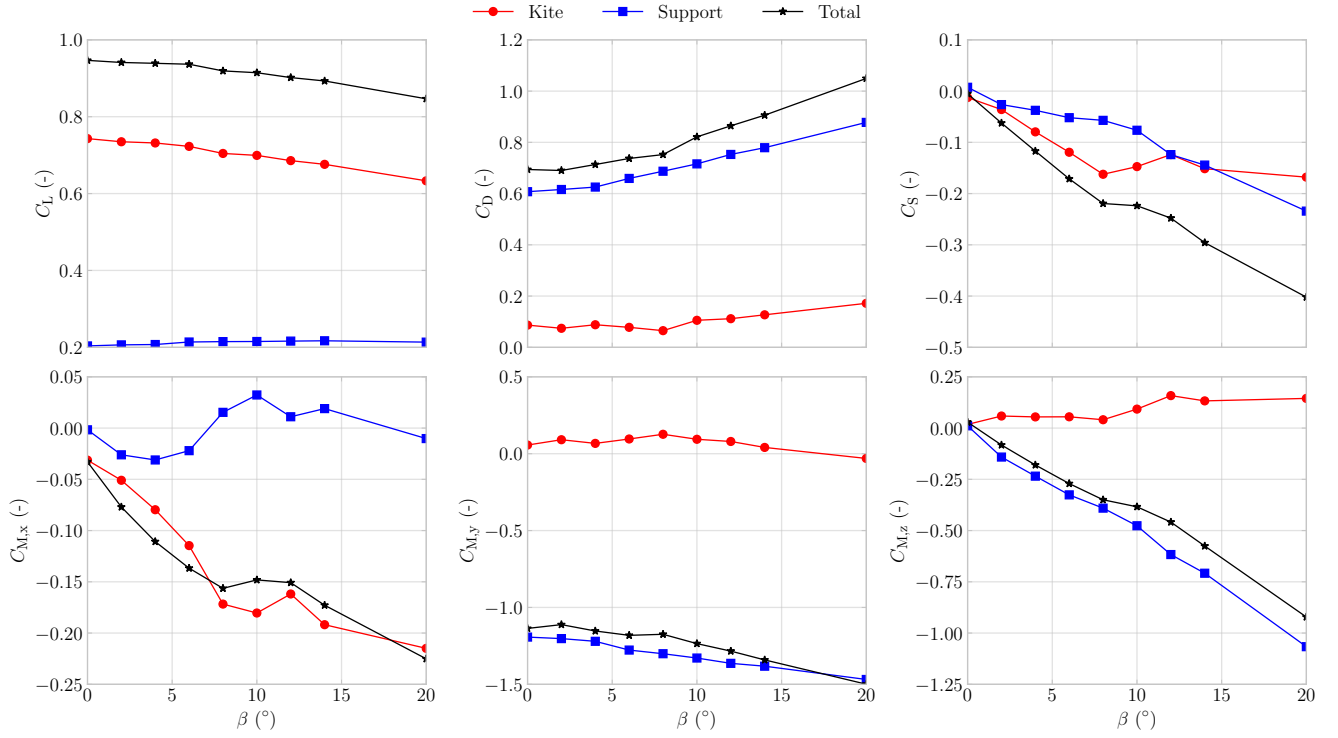

**Figure D1.** Total, support-structure, and kite measured loads plotted for  $\text{Re} = 5 \times 10^5$  over a positive  $\beta$  sweep, for  $\alpha = 7.4^\circ$ .

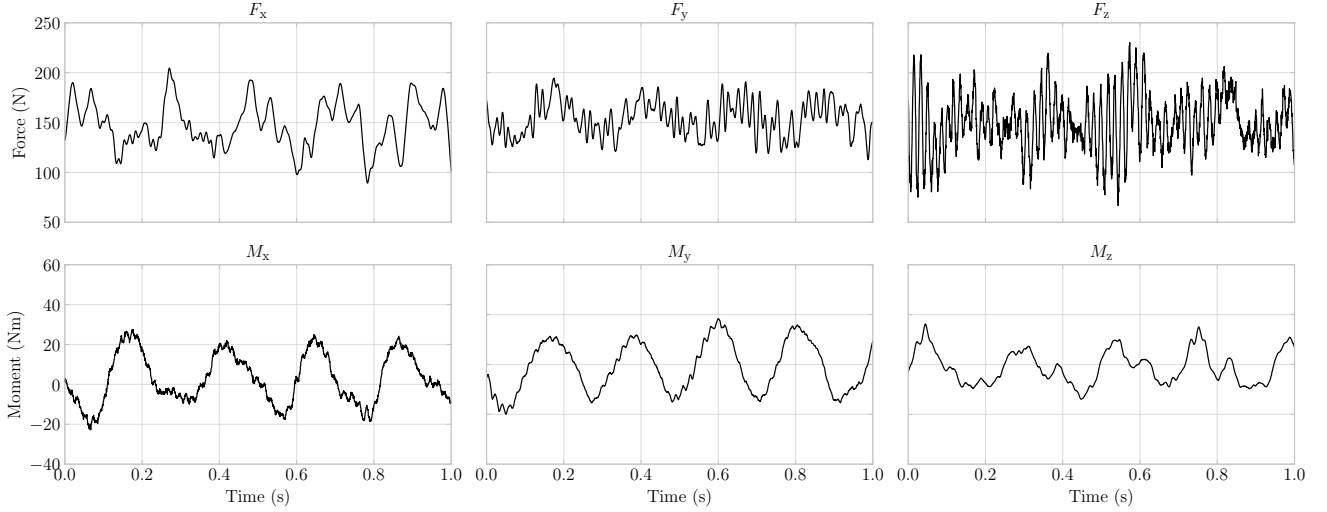

**Figure E1.** Raw measured values at 2000 Hz by the load balance, over a 1 s period taken at  $25 \text{ ms}^{-1}$  with  $\alpha = 15^\circ$  and  $\beta = 0^\circ$ .



To examine the influence of wind speed on the frequency content and to identify potential resonance behavior, the normalized PSDs were plotted up to 100 Hz; see Fig. E2. This frequency range was chosen as the PSD values beyond 100 Hz are negligible in all channels except  $F_z$ . As most PSD peaks are concentrated at lower frequencies, the data were also plotted up to 10 Hz; see Fig. E3.

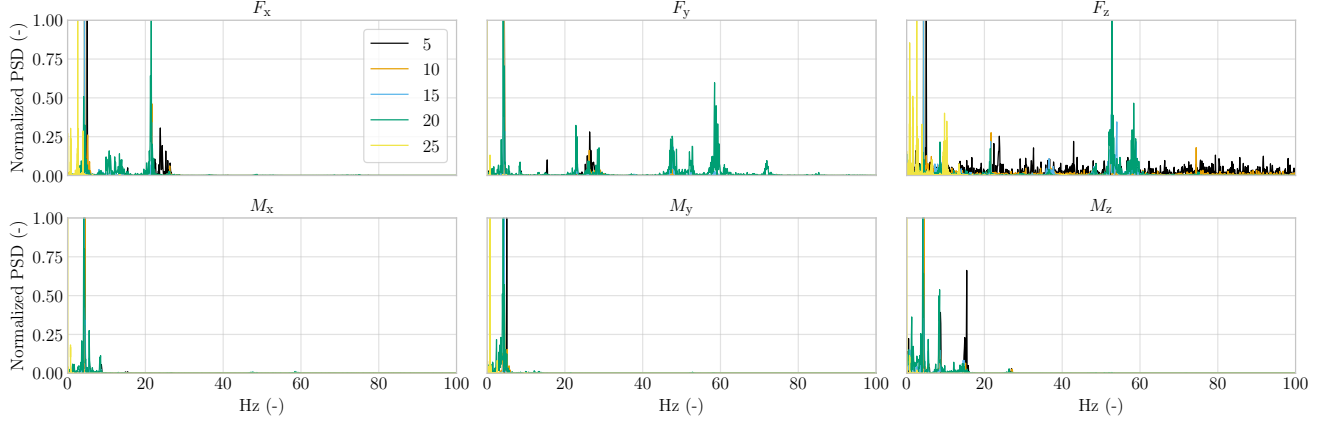

**Figure E2.** Raw measurements transformed into PSD using FFT and a periodogram function and displayed for the three force and moment components up to 100 Hz.

At  $U_\infty = 25 \text{ ms}^{-1}$ , the number and magnitude of PSD peaks increased, indicating the presence of multiple vibrational modes and aligning with qualitative observations of stronger vibrations. Potential sources of the observed vibrations include structural resonance, wherein the natural frequencies of the experimental setup are excited by unsteady aerodynamic loads, and vortex shedding from the model or its mounting components, which can introduce periodic forcing. Both mechanisms are known to amplify dynamic responses in wind tunnel experiments, particularly at elevated angles of attack and higher wind speeds. Across most components and flow conditions, a dominant peak was consistently observed at 4–5 Hz, corresponding to the natural frequency of the supporting blue table onto which the setup was mounted; see Fig. 2 (LeBlanc and Ferreira, 2018). The alignment of these peaks with the structural resonance frequency confirms the occurrence of resonance and explains the elevated uncertainties observed at high  $\alpha$  and  $\beta$ . To avoid introducing filtering-related artifacts and to remain conservative on the uncertainty, it was decided not to filter out the 4–5 Hz band.

## Appendix F: Angle of attack offset correction

An offset of  $1.02^\circ$  in the angle of attack was identified in the original V3 kite CAD geometry. This offset originated from a geometric inconsistency: the vector from the mid-span leading edge to trailing edge was tilted upward by

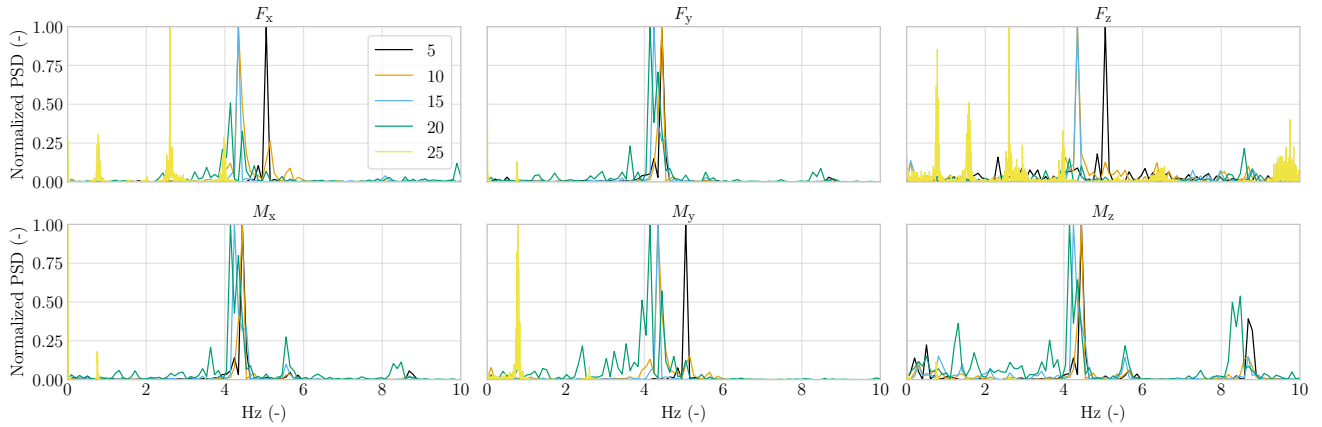

**Figure E3.** Raw measurements transformed into PSD using FFT and a periodogram function and displayed for the three force and moment components up to 10 Hz.

1.02° relative to the intended horizontal reference plane, as shown in Fig. F1. All subsequent simulations in this work were corrected by applying this offset to maintain alignment with the conventional aerodynamic reference frame.

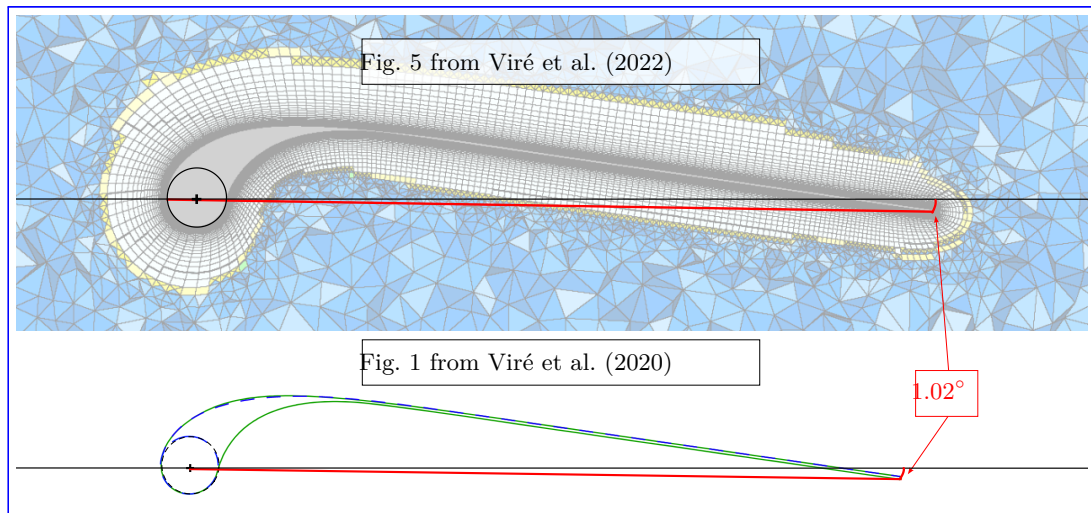

**Figure F1.** Geometric verification of the angle-of-attack offset in the original CAD geometry. Each of the three images stacked vertically illustrates the LEI airfoil of the V3 kite at mid-span. Black lines indicate cross-sectional slices through the leading edge, while red lines represent slices through the trailing edge. The visible vertical mismatch between these lines confirms the presence of the offset.

This misalignment was inadvertently propagated into earlier RANS-CFD studies, including those by Viré et al. (2020) and Viré et al. (2022). As a result, the angles of attack reported in those publications do not strictly adhere to the standard aerodynamic definition, namely the angle between the incoming flow and the chord line.

690 The issue was discovered during the present wind tunnel campaign. In subsequent discussions with G. Lebesque—whose MSc thesis formed the basis of (Viré et al., 2022)—it was confirmed that the offset had gone unnoticed at the time. This was further substantiated through cross-sectional geometric inspection, where lines connecting the leading and trailing edges showed a clear tilt relative to a horizontal reference, see Fig. F1.

To resolve this discrepancy, the geometry has been corrected to eliminate the offset. Updated and verified CAD files have been made publicly available at: [https://awegroup.github.io/TUDELFT\\_V3\\_KITE/docs/datasets.html](https://awegroup.github.io/TUDELFT_V3_KITE/docs/datasets.html).

695

## References

- Anderson, J. D.: Fundamentals of aerodynamics, McGraw-Hill Inc., 5th edn., 2016.
- Babinsky, H.: The Aerodynamic Performance of Paragliders, *The Aeronautical Journal*, 103, 421–428, <https://doi.org/10.1017/S0001924000027974>, 1999.
- 700 Balakumar, P.: Laminar to turbulence transition in boundary layers due to tripping devices, in: AIAA Scitech 2021 Forum, <https://doi.org/https://doi.org/10.2514/6.2021-1948>, 2021.
- Barlow, J. B., Rae, W. H., and Pope, A.: Low-Speed Wind Tunnel Testing, John Wiley & Sons, New York, 3rd edn., ISBN 978-0471557746, 1999.
- Batchelor, G. K.: Interference in a Wind Tunnel of Octagonal Section, Tech. rep., Australian Committee for Aeronautics  
705 (CSIR), 1944.
- Bechtle, P., Schelbergen, M., Schmehl, R., Zillmann, U., and Watson, S.: Airborne wind energy resource analysis, *Renewable Energy*, 141, 1103–1116, <https://doi.org/10.1016/j.renene.2019.03.118>, 2019.
- Belloc, H.: Wind Tunnel Investigation of a Rigid Paraglider Reference Wing, *Journal of Aircraft*, 52, 703–708, <https://doi.org/10.2514/1.C032513>, 2015.
- 710 Bosch, A., Schmehl, R., Tiso, P., and Rixen, D.: Dynamic nonlinear aeroelastic model of a kite for power generation, *Journal of Guidance, Control and Dynamics*, 37, 1426–1436, <https://doi.org/10.2514/1.G000545>, 2014.
- Braslow, A. and Knox, E.: Simplified method for determining critical height of distributed roughness particles for boundary-layer transition, Tech. Rep. TN 4363, NACA, <https://ntrs.nasa.gov/citations/19930085292>, 1958.
- Breukels, J.: An Engineering Methodology for Kite Design, Ph.D. thesis, Delft University of Technology, <http://resolver.tudelft.nl/uuid:cdece38a-1f13-47cc-b277-ed64fdda7cdf>, 2011.
- 715 Cayon, O., Gaunaa, M., and Schmehl, R.: Fast Aero-Structural Model of a Leading-Edge Inflatable Kite, *Energies*, 16, 3061, <https://doi.org/10.3390/en16073061>, 2023.
- Cayon, O., Watson, S., and Schmehl, R.: Kite as a Sensor: Wind and State Estimation in Tethered Flying Systems, *Wind Energy Science Discussions*, <https://doi.org/10.5194/wes-2024-182>, 2025.
- 720 Cocke, B. W.: Wind-Tunnel Investigation of the Aerodynamic and Structural Deflection Characteristics of the Goodyear Inflatoplane, Tech. Rep. 19930090147, National Advisory Committee for Aeronautics, 1958.
- Collin, C.: Interference Effects in Automotive Open Jet Wind Tunnels, Ph.D. thesis, Technische Universität München, <https://mediatum.ub.tum.de/1468822>, 2019.
- Coutinho, K.: Life cycle assessment of a soft-wing airborne wind energy system and its application within an off-grid hybrid power plant configuration, Master’s thesis, Delft University of Technology, <https://resolver.tudelft.nl/uuid:55533d19-21e1-4851-bf7c-7f3af008aaaa>, 2024.
- Dadd, G. M., Hudson, D. A., and Shenoi, R. A.: Comparison of Two Kite Force Models with Experiment, *Journal of Aircraft*, 47, 212–224, <https://doi.org/10.2514/1.44738>, 2010.
- De Solminihac, A., Alain Nême, C. D., Leroux, J.-B., Roncin, K., Jochum, C., and Parlier, Y.: Kite as a Beam: A fast Method to  
730 get the Flying Shape, in: *Airborne Wind Energy – Advances in Technology Development and Research*, edited by Schmehl, R., Green Energy and Technology, chap. 4, pp. 79–97, Springer, Singapore, <https://doi.org/10.1007/978-981-10-1947-0>, 2018.

- De Tavernier, D.: Aerodynamic Advances in Vertical-Axis Wind Turbines, Ph.D. thesis, Delft University of Technology, <https://doi.org/https://doi.org/10.4233/uuid:7086f01f-28e7-4e1b-bf97-bb3e38dd22b9>, 2021.
- 735 Deaves, M.: An Investigation of the Non-Linear 3D Flow Effects Relevant for Leading Edge Inflatable Kites, Master's thesis, Delft University of Technology, <https://resolver.tudelft.nl/uuid:ccb56154-0b70-4a41-8223-24b0f8d145c5>, 2015.
- Den Boer, R.: Low Speed Aerodynamic Characteristics of a Two-Dimensional Sail Wing with Adjustable Slack of the Sail, Tech. Rep. LR-307, Technische Hogeschool Delft, Luchtvaart- en Ruimtevaarttechniek, <https://resolver.tudelft.nl/uuid:18ae2cc6-434e-49c8-9296-d3fa450850a5>, 1980.
- 740 Desai, S., Schetz, J. A., Kapania, R. K., and Gupta, R.: Wind Tunnel Testing of Tethered Inflatable Wings, *Journal of Aircraft*, 0, 1–18, <https://doi.org/10.2514/1.C037437>, 2024.
- Dollinger, C., Balaesque, N., Gaudern, N., Gleichauf, D., Sorg, M., and Fischer, A.: IR thermographic flow visualization for the quantification of boundary layer flow disturbances due to the leading edge condition, *Renewable Energy*, 138, 709–721, <https://doi.org/https://doi.org/10.1016/j.renene.2019.01.116>, 2019.
- 745 Driest, E. R. V. and McCauley, M.: The effect of controlled three-dimensional roughness on boundary-layer transition at supersonic speeds, *Journal of the Aerospace Sciences*, 27, 261–271, <https://doi.org/https://doi.org/10.2514/8.8490>, 1960.
- Duport, C.: Modeling with consideration of the fluid-structure interaction of the behavior under load of a kite for auxiliary traction of ships, Ph.D. thesis, University of Bretagne, <https://theses.hal.science/tel-02383312>, 2018.
- Elfert, C., Göhlich, D., and Schmehl, R.: Measurement of the turning behaviour of tethered membrane wings using automated flight manoeuvres, *Wind Energy Science*, 9, 2261–2282, <https://doi.org/10.5194/wes-9-2261-2024>, 2024.
- 750 Elsinga, G. and Westerweel, J.: Tomographic-PIV measurement of the flow around a zigzag boundary layer trip, *Experiments in Fluids*, 52, 865–876, <https://doi.org/https://doi.org/10.1007/s00348-011-1153-8>, 2012.
- Fagiano, L., Quack, M., Bauer, F., Carnel, L., and Oland, E.: Autonomous Airborne Wind Energy Systems: Accomplishments and Challenges, *Annual Review of Control, Robotics, and Autonomous Systems*, 5, <https://doi.org/10.1146/annurev-control-042820-124658>, 2022.
- 755 FARO: FARO Vantage E laser tracker, [https://media.faro.com/-/media/Project/FARO/FARO/FARO/Resources/2\\_TECH-SHEET/FARO-Vantage-Laser-Trackers/TechSheet\\_Vantage\\_ENG.pdf](https://media.faro.com/-/media/Project/FARO/FARO/FARO/Resources/2_TECH-SHEET/FARO-Vantage-Laser-Trackers/TechSheet_Vantage_ENG.pdf), 2024.
- Flay, R. G. J. and Jackson, P. S.: Flow Simulations for Wind-Tunnel Studies of Sail Aerodynamics, *Journal of Wind Engineering and Industrial Aerodynamics*, 44, 2703–2714, [https://doi.org/10.1016/0167-6105\(92\)90064-H](https://doi.org/10.1016/0167-6105(92)90064-H), 1992.
- 760 Folkersma, M., Schmehl, R., and Viré, A.: Boundary layer transition modeling on leading edge inflatable kite airfoils, *Wind Energy*, 22, 908–921, <https://doi.org/10.1002/we.2329>, 2019.
- Gahraz, S. R. J., Lazim, T. M., and Darbandi, M.: Wind Tunnel Study of the Effect of Zigzag Tape on Aerodynamics Performance of a Wind Turbine Airfoil, *Journal of Advanced Research in Fluid Mechanics and Thermal Sciences*, 41, 1–9, [https://www.akademiabaru.com/doc/ARFMTSV41\\_N1\\_P1\\_9.pdf](https://www.akademiabaru.com/doc/ARFMTSV41_N1_P1_9.pdf), 2018.
- 765 Gent, B. L.: Interference in a Wind Tunnel of Rectangular Octagonal Section, Tech. rep., Australian Committee for Aeronautics (CSIR), 1944.
- Greene, W. H.: *Econometric Analysis*, Pearson Education Limited, Harlow, United Kingdom, 8 edn., ISBN 978-1-292-23113-6, <https://www.pearson.com/store/p/econometric-analysis-global-edition/P200000004175/9781292231150>, global Edition, 2019.

- 770 Hummel, J., Göhlich, D., and Schmehl, R.: Automatic measurement and characterization of the dynamic properties of tethered membrane wings, *Wind Energy Science*, 4, 41–55, <https://doi.org/10.5194/wes-4-41-2019>, 2019.
- Kleidon, A.: Physical limits of wind energy within the atmosphere and its use as renewable energy: From the theoretical basis to practical implications, *Meteorologische Zeitschrift*, 30, 203–225, <https://doi.org/10.1127/metz/2021/1062>, 2021.
- Langel, C., Chow, R., van Dam, C., Maniaci, D., Ehrmann, R., and White, E.: A computational approach to simulating the effects of realistic surface roughness on boundary layer transition, in: 52nd Aerospace Sciences Meeting, <https://doi.org/https://doi.org/10.2514/6.2014-0234>, 2014.
- 775 LeBlanc, B. P. and Ferreira, C. S.: Experimental Determination of Thrust Loading of a 2-Bladed Vertical Axis Wind Turbine, *Journal of Physics Conference Series*, 1037, 022 043, <https://doi.org/10.1088/1742-6596/1037/2/022043>, 2018.
- Leloup, R., Roncin, K., Bles, G., Leroux, J. B., Jochum, C., and Parlier, Y.: Estimation of the lift-to-drag ratio using the lifting line method: Application to a leading edge inflatable kite, in: *Airborne Wind Energy*, edited by Ahrens, U., Schmehl, R., and Diehl, M., chap. 19, pp. 339–355, Springer, [https://doi.org/10.1007/978-3-642-39965-7\\_19](https://doi.org/10.1007/978-3-642-39965-7_19), 2013.
- 780 Lignarolo, L., Ragni, D., Krishnaswami, C., Chen, Q., Ferreira, C. S., and van Bussel, G.: Experimental Analysis of the Wake of a Horizontal-Axis Wind-Turbine Model, *Renewable Energy*, 70, 31–46, <https://doi.org/10.1016/j.renene.2014.01.020>, 2014.
- 785 Lock, C. N. H.: The Interference of a Wind Tunnel on a Symmetrical Body, *Aeronautical Research Committee Reports & Memoranda 1275*, Cranfield University, <https://reports.aerade.cranfield.ac.uk/handle/1826.2/4107>, 1929.
- Matos, C., Mahalingam, R., Ottinger, G., Klapper, J., Funk, R., and Komerath, N.: Wind Tunnel Measurements of Parafoil Geometry and Aerodynamics, in: 36th AIAA Aerospace Sciences Meeting and Exhibit, AIAA 98-0606, School of Aerospace Engineering, Georgia Institute of Technology, American Institute of Aeronautics and Astronautics, Reno, NV, USA, <https://doi.org/10.2514/6.1998-606>, 1998.
- 790 Mercker, E., Wickern, G., and Weidemann, J.: Contemplation of Nozzle Blockage in Open Jet Wind-Tunnels in View of Different ‘Q’ Determination Techniques, Tech. Rep. 970136, SAE Technical Paper, <https://doi.org/10.4271/970136>, 1997.
- Newey, W. K. and West, K. D.: A Simple, Positive Semi-definite, Heteroscedasticity and Autocorrelation Consistent Covariance Matrix, *Econometrica*, 55, 703–708, <https://doi.org/10.2307/1913610>, 1987.
- 795 Nicolaides, J. D.: Parafoil Wind Tunnel Tests, Tech. Rep. AFFDL-TR-70-146, Air Force Flight Dynamics Laboratory, <https://apps.dtic.mil/sti/citations/AD0731564>, 1971.
- Nüst, D. and Eglen, S. J.: CODECHECK: an Open Science initiative for the independent execution of computations underlying research articles during peer review to improve reproducibility, *F1000Research*, 10, 253, <https://doi.org/10.12688/f1000research.51738.2>, [version 2; peer review: 2 approved], 2021.
- 800 Oehler, J. and Schmehl, R.: Aerodynamic characterization of a soft kite by in situ flow measurement, *Wind Energy Science*, 4, 1–21, <https://doi.org/10.5194/wes-4-1-2019>, 2019.
- Oehler, J., van Reijen, M., and Schmehl, R.: Experimental Investigation of Soft Kite Performance During Turning Maneuvers, *Journal of Physics: Conference Series*, 1037, 052 004, <https://doi.org/10.1088/1742-6596/1037/5/052004>, 2018.
- Okda, S. et al.: Testing of the Aerodynamic Characteristics of an Inflatable Airfoil Section, *Journal of Aerospace Engineering*, 33, 1–18, [https://doi.org/10.1061/\(ASCE\)AS.1943-5525.0001187](https://doi.org/10.1061/(ASCE)AS.1943-5525.0001187), 2020.
- 805 Pearson, K.: Mathematical contributions to the theory of evolution. III. Regression, heredity, and panmixia, *Philos Trans R Soc Lond Ser A*, 187, 253–318, <https://doi.org/10.1098/rsta.1896.0007>, 1896.

- Phillips, W. F. and Snyder, D. O.: Modern Adaptation of Prandtl's Classic Lifting-Line Theory, *Journal of Aircraft*, 37, 662–670, <https://doi.org/10.2514/2.2649>, 2000.
- 810 Poland, J. A. W. and Schmehl, R.: Modelling Aero-Structural Deformation of Flexible Membrane Kites, *Energies*, 16, 5264, <https://doi.org/10.3390/en16145264>, 2023.
- Poland, J. A. W., Masure, K. R., Cayon, O., and Schmehl, R.: Aerodynamic simulations for kite design [in preparation], *Wind Energy Science*, 2025.
- Poling, B. E., Prausnitz, J. M., and O'Connell, J. P.: Properties of Gases and Liquids, McGraw-Hill Education, New York, 5th edn., <https://www.accessengineeringlibrary.com/content/book/9780070116825>, 2001.
- 815 Prandtl, L.: Tragflügeltheorie. I. Mitteilung, *Nachrichten von der Gesellschaft der Wissenschaften zu Göttingen, Mathematisch-Physikalische Klasse*, 1918, 451–477, <http://eudml.org/doc/59036>, 1918.
- Python, B.: Methodology Improvement for Performance Assessment of Pumping Kite Power Wing, Master's thesis, Delft University of Technology and Ecole Polytechnique Fédérale de Lausanne, [https://resolver.tudelft.nl/uuid:](https://resolver.tudelft.nl/uuid:462bba8d-e0ca-419d-a3b0-aaa93c284625)
- 820 462bba8d-e0ca-419d-a3b0-aaa93c284625, 2017.
- Rementeria Zalduegui, A. and Garry, K.: Performance for Power Generation, in: Conference Paper, Cranfield University, <http://resolver.tudelft.nl/uuid:53377f4c-c4d4-4dbe-b316-2796443ff38b>, 2019.
- Rosenhead, L.: The Airfoil in a Wind Tunnel of Elliptic Cross-Section, *Proceedings of the Royal Society, Series A*, 140, 579, 1933.
- 825 Roullier, A.: Experimental analysis of a kite system's dynamics, Master's thesis, EPFL, <https://doi.org/10.5281/zenodo.7752407>, 2020.
- Rushdi, M. A., Rushdi, A. A., Dief, T. N., Halawa, A. M., Yoshida, S., and Schmehl, R.: Power Prediction of Airborne Wind Energy Systems Using Multivariate Machine Learning, *Energies*, 13, 2367, <https://doi.org/10.3390/en13092367>, 2020.
- Schelbergen, M. and Schmehl, R.: Swinging motion of a kite with suspended control unit flying turning manoeuvres, *Wind*
- 830 *Energy Science*, 9, 1323–1338, <https://doi.org/10.5194/wes-9-1323-2024>, 2024.
- Schelbergen, M., Schmehl, R., Buchholz, B., Breuer, J., and Peschel, J.: Kite power flight data acquired on 8 October 2019, <https://doi.org/10.4121/19376174.v1>, cC BY 4.0, Dataset, Available at 4TU.ResearchData, 2024.
- Schmidt, E., De Lellis, M., Saraiva, R., and Trofino, A.: State Estimation of a Tethered Airfoil for Monitoring, Control and Optimization, *IFAC-PapersOnLine*, 50, 13 246–13 251, <https://doi.org/10.1016/j.ifacol.2017.08.1960>, 2017.
- 835 Smith, S., Simpson, A., and Jacob, J.: Aeroelastic Behavior of Inflatable Wings: Wind Tunnel and Flight Testing, in: 45th AIAA Aerospace Sciences Meeting and Exhibit, p. 1069, <https://doi.org/10.2514/6.2007-1069>, 2007.
- Soltani, M., Birjandi, A., and Moorani, M. S.: Effect of surface contamination on the performance of a section of a wind turbine blade, *Scientia Iranica*, 18, 349–357, <https://doi.org/https://doi.org/10.1016/j.scient.2011.05.024>, 2011.
- Speziale, C. G.: Turbulence Modeling for Time-Dependent RANS and VLES: A Review, *AIAA Journal*, 36, 173–184,
- 840 <https://doi.org/10.2514/2.7499>, 1998.
- Tani, I.: Boundary-layer transition, *Annual Review of Fluid Mechanics*, 1, 169–196, <https://doi.org/https://doi.org/10.1146/annurev.fl.01.010169.001125>, 1969.
- Van der Vlugt, R., Bley, A., Noom, M., and Schmehl, R.: Quasi-steady model of a pumping kite power system, *Renewable Energy*, 131, 83–99, <https://doi.org/10.1016/j.renene.2018.07.023>, 2019.

- 845 Van Hagen, L., Petrick, K., Wilhelm, S., and Schmehl, R.: Life-Cycle Assessment of a Multi-Megawatt Airborne Wind Energy System, *Energies*, 16, 1750, <https://doi.org/10.3390/en16041750>, 2023.
- van Rooij, R. and Timmer, W.: Roughness sensitivity considerations for thick rotor blade airfoils, *Journal of Solar Energy Engineering*, 125, 468–478, <https://doi.org/https://doi.org/10.2514/6.2003-350>, 2003.
- Van Spronsen, J. M.: Rigidized subscale kite wind tunnel test, Master’s thesis, Delft University of Technology, <https://resolver.tudelft.nl/uuid:61f979d7-0d90-4374-b84d-19b57d6d6bea>, 2024.
- 850 Van Til, J., De Lellis, M., Saraiva, R., and Trofino, A.: Dynamic model of a C-shaped bridled kite using a few rigid plates, in: *Airborne Wind Energy – Advances in Technology Development and Research*, edited by Schmehl, R., Green Energy and Technology, chap. 5, pp. 99–115, Springer, Singapore, [https://doi.org/10.1007/978-981-10-1947-0\\_5](https://doi.org/10.1007/978-981-10-1947-0_5), 2018.
- Vermillion, C., Cobb, M., Fagiano, L., Leuthold, R., Diehl, M., Smith, R. S., Wood, T. A., Rapp, S., Schmehl, R., Olinger, D., and Demetriou, M.: Electricity in the Air: Insights From Two Decades of Advanced Control Research and Experimental Flight Testing of Airborne Wind Energy Systems, *Annual Reviews in Control*, 52, 330–357, <https://doi.org/10.1016/j.arcontrol.2021.03.002>, 2021.
- 855 Viré, A., Demkowicz, P., Folkersma, M., Roullier, A., and Schmehl, R.: Reynolds-averaged Navier-Stokes simulations of the flow past a leading edge inflatable wing for airborne wind energy applications, *Journal of Physics: Conference Series*, 1618, 032007, <https://doi.org/10.1088/1742-6596/1618/3/032007>, 2020.
- 860 Viré, A., Lebesque, G., Folkersma, M., and Schmehl, R.: Effect of Chordwise Struts and Misaligned Flow on the Aerodynamic Performance of a Leading-Edge Inflatable Wing, *Energies*, 15, 1450, <https://doi.org/10.3390/en15041450>, 2022.
- Wachter, A. D.: Deformation and Aerodynamic Performance of a Ram-Air Wing, Master’s thesis, Delft University of Technology, <https://resolver.tudelft.nl/uuid:786e3395-4590-4755-829f-51283a8df3d2>, 2008.
- 865 Watchorn, J. P.: Aerodynamic Load Modelling for Leading Edge Inflatable Kites, Master’s thesis, Delft University of Technology, <https://resolver.tudelft.nl/uuid:42f611a2-ef79-4540-a43c-0ea827700388>, 2023.
- Wickern, G.: A Theoretical Approach towards the Self-Correcting Open Jet Wind Tunnel, Tech. Rep. 2014-01-0579, SAE Technical Paper, <https://doi.org/10.4271/2014-01-0579>, 2014.
- Ye, Q.: Mechanisms of boundary layer transition induced by isolated roughness, Ph.D. thesis, Delft University of Technology, <https://doi.org/https://doi.org/10.4233/uuid:b1b5332a-33d5-4fd4-b386-3acc48e12003>, 2017.
- 870 Zhang, Y., Gillebaart, T., van Zuijlen, A., van Bussel, G., and Bijl, H.: Experimental and numerical investigations of aerodynamic loads and 3D flow over non-rotating MEXICO blades, *Wind Energy*, 20, 585–600, <https://doi.org/https://doi.org/10.1002/we.2025>, 2017a.
- Zhang, Y., van Zuijlen, A., and van Bussel, G.: The MEXICO rotor aerodynamic loads prediction: ZigZag tape effects and laminar-turbulent transition modeling in CFD, *Journal of Wind Engineering and Industrial Aerodynamics*, 168, 152–163, <https://doi.org/https://doi.org/10.1016/j.jweia.2017.06.002>, 2017b.
- 875
